1 **Extensive loss of cell cycle and DNA repair genes in an ancient lineage of bipolar budding**  
2 **yeasts**

3  
4 Jacob L. Steenwyk<sup>1</sup>, Dana A. Opulente<sup>2</sup>, Jacek Kominek<sup>2</sup>, Xing-Xing Shen<sup>1</sup>, Xiaofan Zhou<sup>3</sup>,  
5 Abigail L. Labella<sup>1</sup>, Noah P. Bradley<sup>1</sup>, Brandt F. Eichman<sup>1</sup>, Neža Čadež<sup>5</sup>, Diego Libkind<sup>6</sup>,  
6 Jeremy DeVirgilio<sup>7</sup>, Amanda Beth Hulfachor<sup>4</sup>, Cletus P. Kurtzman<sup>7</sup>, Chris Todd Hittinger<sup>2\*</sup>, and  
7 Antonis Rokas<sup>1\*</sup>

8  
9 1. Department of Biological Sciences, Vanderbilt University, Nashville, TN 37235, USA

10 2. Laboratory of Genetics, Genome Center of Wisconsin, DOE Great Lakes Bioenergy Research  
11 Center, Wisconsin Energy Institute, J. F. Crow Institute for the Study of Evolution, University of  
12 Wisconsin–Madison, Wisconsin 53706, USA

13 3. Guangdong Province Key Laboratory of Microbial Signals and Disease Control, Integrative  
14 Microbiology Research Centre, South China Agricultural University, 510642 Guangzhou, China

15 4. Laboratory of Genetics, Genome Center of Wisconsin, Wisconsin Energy Institute, J.F. Crow  
16 Institute for the Study of Evolution, University of Wisconsin-Madison, Madison, WI 53706,  
17 USA

18 5. University of Ljubljana, Biotechnical Faculty, Department of Food Science and Technology,  
19 Jamnikarjeva 101, 1000 Ljubljana, Slovenia

20 6. Laboratorio de Microbiología Aplicada, Biotecnología y Bioinformática, Instituto Andino  
21 Patagónico de Tecnologías Biológicas y Geoambientales (IPATEC), Universidad Nacional del  
22 Comahue - CONICET, San Carlos de Bariloche, 8400, Río Negro, Argentina

23 7. Mycotoxin Prevention and Applied Microbiology Research Unit, National Center for  
24 Agricultural Utilization Research, Agricultural Research Service, US Department of Agriculture,  
25 Peoria, Illinois 61604, USA

26

27 \*Correspondence: [cthittinger@wisc.edu](mailto:cthittinger@wisc.edu) and [antonis.rokas@vanderbilt.edu](mailto:antonis.rokas@vanderbilt.edu)

28

29 Running title: Gene loss among *Hanseniaspora*

30

31 Keywords: phylogenomics, Saccharomycotina, biodiversity, carbohydrate metabolism,  
32 genomics, DNA repair, cell cycle, genome stability, DNA damage response

33 **Abstract**

34 Cell cycle checkpoints and DNA repair processes protect organisms from potentially lethal  
35 mutational damage. Compared to other budding yeasts in the subphylum Saccharomycotina, we  
36 noticed that a lineage in the genus *Hanseniaspora* exhibited very high evolutionary rates, low  
37 GC content, small genome sizes, and lower gene numbers. To better understand *Hanseniaspora*  
38 evolution, we analyzed 25 genomes, including 11 newly sequenced, representing 18 / 21 known  
39 species in the genus. Our phylogenomic analyses identify two *Hanseniaspora* lineages, the fast-  
40 evolving lineage (FEL), which began diversifying ~87 million years ago (mya), and the slow-  
41 evolving lineage (SEL), which began diversifying ~54 mya. Remarkably, both lineages lost  
42 genes associated with the cell cycle and genome integrity, but these losses were greater in the  
43 FEL. For example, all species lost the cell cycle regulator *WHI5*, and the FEL lost components of  
44 the spindle checkpoint pathway (e.g., *MAD1*, *MAD2*) and DNA damage checkpoint pathway  
45 (e.g., *MEC3*, *RAD9*). Similarly, both lineages lost genes involved in DNA repair pathways,  
46 including the DNA glycosylase gene *MAG1*, which is part of the base excision repair pathway,  
47 and the DNA photolyase gene *PHR1*, which is involved in pyrimidine dimer repair. Strikingly,  
48 the FEL lost 33 additional genes, including polymerases (i.e., *POLA* and *POL32*) and telomere-  
49 associated genes (e.g., *RIF1*, *RFA3*, *CDC13*, *PBP2*). Echoing these losses, molecular  
50 evolutionary analyses reveal that, compared to the SEL, the FEL stem lineage underwent a burst  
51 of accelerated evolution, which resulted in greater mutational loads, homopolymer instabilities,  
52 and higher fractions of mutations associated with the common endogenously damaged base, 8-  
53 oxoguanine. We conclude that *Hanseniaspora* is an ancient lineage that has diversified and  
54 thrived, despite lacking many otherwise highly conserved cell cycle and genome integrity genes  
55 and pathways, and may represent a novel system for studying cellular life without them.

## 56 **Introduction**

57 Genome maintenance is largely attributed to the fidelity of cell cycle checkpoints, DNA repair  
58 pathways, and their interaction [1]. Dysregulation of these processes often leads to the loss of  
59 genomic integrity [2] and hypermutation, or the acceleration of mutation rates [3]. For example,  
60 improper control of cell cycle and DNA repair processes can lead to 10- to 100-fold increases in  
61 mutation rate [4]. Furthermore, deletions of single genes can have profound effects on genome  
62 stability. For example, the deletion of *MEC3*, which is involved in sensing DNA damage in the  
63 G1 and G2/M cell cycle phases, can lead to a 54-fold increase in the gross chromosomal  
64 rearrangement rate [5]. Similarly, nonsense mutations in mismatch repair proteins account for the  
65 emergence of hypermutator strains in the yeast pathogens *Cryptococcus deuterogattii* [6] and  
66 *Cryptococcus neoformans* [7,8]. Due to their importance in ensuring genomic integrity, most  
67 genome maintenance-associated processes are thought to be evolutionarily ancient and broadly  
68 conserved [9].

69  
70 One such ancient and highly conserved process in eukaryotes is the cell cycle [10,11]. Landmark  
71 features of cell cycle control include cell size control, the mitotic spindle checkpoint, the DNA  
72 damage response checkpoint, and DNA replication [9]. Cell size is controlled, in part, through  
73 the activity of *WHI5*, which represses the G1/S transition by inhibiting G1/S transcription [12].  
74 Similarly, when kinetochores are improperly attached or are not attached to microtubules, the  
75 mitotic spindle checkpoint helps to prevent activation of the anaphase-promoting complex  
76 (APC), which controls the G1/S and G2/M transitions [9,13]. Additional key regulators in this  
77 process are Mad1 and Mad2, which dimerize at unattached kinetochores and delay anaphase.  
78 Failure of Mad1:Mad2 recruitment to unattached kinetochores results in failed checkpoint

79 activity [14]. Importantly, many regulators, including but not limited to those mentioned here,  
80 are highly similar in structure and function between fungi and animals and are thought to have a  
81 shared ancestry [10]. Interestingly, cell cycle initiation in certain fungi (including  
82 *Hanseniaspora*) is achieved through SBF, a transcription factor that is functionally equivalent  
83 but evolutionarily unrelated to E2F, the transcription factor that that initiates the cycle in  
84 animals, plants, and certain early-diverging fungal lineages [11]. SBF is postulated to have been  
85 acquired via a viral infection, suggesting that evolutionary changes in this otherwise highly  
86 conserved process can and do rarely occur [11,15].  
87  
88 DNA damage checkpoints can arrest the cell cycle and influence the activation of DNA repair  
89 pathways, the recruitment of DNA repair proteins to damaged sites, and the composition and  
90 length of telomeres [16]. For example, *MEC3* and *RAD9*, function as checkpoint genes required  
91 for arrest in the G2 phase after DNA damage has occurred [17]. Additionally, the deletions of  
92 DNA damage and checkpoint genes have been known to cause hypermutator phenotypes in the  
93 baker's yeast *Saccharomyces cerevisiae* [18]. Similarly, hypermutator phenotypes are associated  
94 with loss-of-function mutations in DNA polymerase genes [19]. For example, deletion of the  
95 DNA polymerase  $\delta$  subunit gene, *POL32*, which participates in multiple DNA repair processes,  
96 causes an increased mutational load and hypermutation in *S. cerevisiae*, in part, through the  
97 increase of genomic deletions and small indels [18,20]. Likewise, the deletion of *MAG1*, a gene  
98 encoding a DNA glycosylase that removes damaged bases via the multi-step base excision repair  
99 pathway, can cause a 2,500-fold increased sensitivity to the DNA alkylating agent methyl  
100 methanesulfonate [21].  
101

102 In contrast to genes in multi-step DNA repair pathways, other DNA repair genes function  
103 individually or are parts of simpler regulatory processes. For example, *PHR1*, a gene that  
104 encodes a photolyase, is activated in response to and repairs pyrimidine dimers, one of the most  
105 frequent types of lesions caused by damaging UV light [22,23]. Other DNA repair genes do not  
106 interact with DNA but function to prevent the misincorporation of damaged bases. For example,  
107 *PCDI* encodes a 8-oxo-dGTP diphosphatase [24], which suppresses  $G \rightarrow T$  or  $C \rightarrow A$   
108 transversions by removing 8-oxo-dGTP, thereby preventing the incorporation of the base 8-oxo-  
109 dG, one of the most abundant endogenous forms of an oxidatively damaged base [24–26].  
110 Collectively, these studies demonstrate that the loss of DNA repair genes can lead to  
111 hypermutation and increased sensitivity to DNA damaging agents.

112  
113 Hypermutation phenotypes are generally short-lived because most mutations are deleterious and  
114 are generally adaptive only in highly stressful or rapidly fluctuating environments [27]. For  
115 example, in *Pseudomonas aeruginosa* infections of cystic fibrosis patients [28] and mouse gut-  
116 colonizing *Escherichia coli* [29], hypermutation is thought to facilitate adaptation to the host  
117 environment and the evolution of drug resistance. Similarly, in the fungal pathogens *C.*  
118 *deuterogattii* [6] and *C. neoformans* [7,8], hypermutation is thought to contribute to within-host  
119 adaptation, which may involve modulating traits such as drug resistance [6]. However, as  
120 adaptation to a new environment nears completion, hypermutator alleles are expected to decrease  
121 in frequency due to the accumulation of deleterious mutations that result as a consequence of the  
122 high mutation rate [30,31]. In agreement with this prediction, half of experimentally evolved  
123 hypermutating lines of *S. cerevisiae* had reduced mutation rates after a few thousand generations  
124 [32], suggesting hypermutation is a short-lived phenotype and that compensatory mutations can

125 restore or lower the mutation rate. Additionally, this experiment also provided insights to how  
126 strains may cope with hypermutation; for example, all *S. cerevisiae* hypermutating lines  
127 increased their ploidy to presumably reduce the impact of higher mutation rates [32]. Altogether,  
128 hypermutation can produce short-term advantages but causes long-term disadvantages, which  
129 may explain its repeated but short-term occurrence in clinical environments [29] and its  
130 sparseness in natural ones. While these theoretical and experimental studies have provided  
131 seminal insights to the evolution of mutation rate and hypermutation, we still lack understanding  
132 of the long-term, macroevolutionary effects of increased mutation rates.

133  
134 Recently, multiple genome-scale phylogenies of species in the budding yeast subphylum  
135 Saccharomycotina showed that certain species in the bipolar budding yeast genus *Hanseniaspora*  
136 are characterized by very long branches [33–35], which are reminiscent of the very long  
137 branches of fungal hypermutator strains [6–8]. Most of what is known about these cosmopolitan  
138 apiculate yeasts relates to their high abundance on mature fruits and in fermented beverages [36],  
139 especially on grapes and in wine must [37,38]. As a result, *Hanseniaspora* plays a significant  
140 role in the early stages of fermentation and can modify wine color and flavor through the  
141 production of enzymes and aroma compounds [39]. Surprisingly, even with the use of *S.*  
142 *cerevisiae* starter cultures, *Hanseniaspora* species, particularly *Hanseniaspora uvarum*, can  
143 achieve very high cell densities, in certain cases comprising greater than 80% of the total yeast  
144 population, during early stages of fermentation [40], suggesting exceptional growth capabilities  
145 in this environment.

146

147 To gain insight into the long branches and the observed fast growth of *Hanseniaspora*, we  
148 sequenced and extensively characterized gene content and patterns of evolution in 25 genomes,  
149 including 11 newly sequenced for this study, from 18 / 21 known species in the genus. Our  
150 analyses delineated two lineages, the fast-evolving lineage (FEL), which has a strong signature  
151 of acceleration in evolutionary rate at its stem branch, and the slow-evolving lineage (SEL),  
152 which has a weaker signature of evolutionary rate acceleration at its stem branch. Relaxed  
153 molecular clock analyses estimate that the FEL and SEL split ~95 million years ago (mya). The  
154 degree of evolutionary rate acceleration is commensurate with the preponderance of loss of  
155 genes associated with metabolic, cell cycle, and DNA repair processes. Specifically, compared to  
156 *S. cerevisiae*, there are 748 genes that were lost from two-thirds of *Hanseniaspora* genomes with  
157 FEL yeasts having lost an additional 661 genes and SEL yeasts having lost only an additional 23.  
158 Both lineages have lost major cell cycle regulators, including *WHI5* and components of the APC,  
159 while FEL species additionally lost numerous genes associated with the spindle checkpoint (e.g.,  
160 *MAD1* and *MAD2*) and DNA damage checkpoint (e.g., *MEC3* and *RAD9*). Similar patterns are  
161 observed among DNA repair-related genes; *Hanseniaspora* species have lost 14 genes, while the  
162 FEL yeasts have lost an additional 33 genes. For example, both lineages have lost *MAG1* and  
163 *PHR1*, while the FEL has lost additional genes including polymerases (i.e., *POL32* and *POL4*)  
164 and multiple telomere-associated genes (e.g., *RIF1*, *RFA3*, *CDC13*, *PBP2*). Compared to the  
165 SEL, analyses of substitution patterns in the FEL show higher levels of sequence substitutions,  
166 greater instability of homopolymers, and a greater mutational signature associated with the  
167 commonly damaged base, 8-oxo-dG [26]. Furthermore, we find that the transition to transversion  
168 (or transition / transversion) ratios of the FEL and the SEL are both very close to the ratio  
169 expected if transitions and transversions occur neutrally. These results are consistent with the



170 hypothesis that species in the FEL represent a novel example of diversification and long-term  
171 evolutionary survival of a hypermutator lineage, which highlights the potential of *Hanseniaspora*  
172 for understanding the long-term effects of hypermutation on genome function and evolution.

173

## 174 **Results**

### 175 **An exceptionally high evolutionary rate in the FEL stem branch**

176 Concatenation and coalescence analyses of a data matrix of 1,034 single-copy OGs (522,832  
177 sites; 100% taxon-occupancy) yielded a robust phylogeny of the genus *Hanseniaspora* (Fig 1A,  
178 Fig S2, Fig S3). Consistent with previous analyses [34,35,41], our phylogeny revealed the  
179 presence of two major lineages, each of which was characterized by long stem branches; we  
180 hereafter refer to the lineage with a longer stem branch as the fast-evolving lineage (FEL) and to  
181 the other as the slow-evolving lineage (SEL). Relaxed molecular clock analysis suggests that the  
182 FEL and SEL split 95.34 (95% credible interval (CI): 117.38 – 75.36) mya, with the origin of  
183 their crown groups estimated at 87.16 (95% CI: 112.75 – 61.38) and 53.59 (95% CI: 80.21 –  
184 33.17) mya, respectively (Fig 1A, Fig S4, File S2).

185

186 The FEL stem branch is much longer than the SEL stem branch in the *Hanseniaspora* phylogeny  
187 (Fig 1) (see also phylogenies in: Shen et al., 2016, 2018). To determine whether this difference in  
188 branch length was a property of some or all single-gene phylogenies, we compared the difference  
189 in length of the FEL and SEL stem branches among all single-gene trees where each lineage was  
190 recovered monophyletic ( $n = 946$ ). We found that the FEL stem branch was nearly four times  
191 longer ( $0.62 \pm 0.38$  substitutions / site) than the SEL stem branch ( $0.17 \pm 0.11$  substitutions /  
192 site) (Fig 1B;  $p < 0.001$ ; Paired Wilcoxon Rank Sum test). Furthermore, of the 946 gene trees

193 examined, 932 had a much longer FEL stem branch ( $0.46 \pm 0.33 \Delta$  substitutions / site), whereas  
194 only 14 had a slightly longer SEL stem branch ( $0.06 \pm 0.05 \Delta$  substitutions / site).

195

## 196 **The genomes of FEL species have lost substantial numbers of genes**

197 Examination of GC content, genome size, and gene number revealed that the some of the lowest  
198 GC content values, as well as the smallest genomes and lowest gene numbers, across the  
199 subphylum Saccharomycotina are primarily observed in FEL yeasts (Fig S1). Specifically, the  
200 average GC contents for FEL yeasts ( $33.10 \pm 3.53\%$ ), SEL yeasts ( $37.28 \pm 2.05\%$ ), and all other  
201 Saccharomycotina yeasts ( $40.77 \pm 5.58\%$ ) are significantly different ( $\chi^2(2) = 30.00, p < 0.001$ ;  
202 Kruskal-Wallis rank sum test). Further examination revealed only the FEL was significantly  
203 different from other Saccharomycotina yeasts ( $p < 0.001$ ; Dunn's test for multiple comparisons  
204 with Benjamini-Hochberg multi-test correction). For genome size and gene number, FEL yeast  
205 genomes have average sizes of  $9.71 \pm 1.32$  Mb and contain  $4,707.89 \pm 633.56$  genes,  
206 respectively, while SEL yeast genomes have average sizes of  $10.99 \pm 1.66$  Mb and contain  
207  $4,932.43 \pm 289.71$  genes. In contrast, all other Saccharomycotina have average genome sizes and  
208 gene numbers of  $13.01 \pm 3.20$  Mb and  $5,726.10 \pm 1,042.60$ , respectively. Statistically significant  
209 differences were observed between the FEL, SEL, and all other Saccharomycotina (genome size:  
210  $\chi^2(2) = 33.47, p < 0.001$  and gene number:  $\chi^2(2) = 31.52, p < 0.001$ ; Kruskal-Wallis rank sum  
211 test for both). Further examination revealed the only significant difference for genome size was  
212 between FEL and other Saccharomycotina yeasts ( $p < 0.001$ ; Dunn's test for multiple  
213 comparisons with Benjamini-Hochberg multi-test correction), while both the FEL and SEL had  
214 smaller gene sets compared to other Saccharomycotina yeasts ( $p < 0.001$  and  $p = 0.008$ ,  
215 respectively; Dunn's test for multiple comparisons with Benjamini-Hochberg multi-test

216 correction). The lower numbers of genes in the FEL (especially) and SEL lineages were also  
217 supported by gene content completeness analyses using orthologous sets of genes constructed  
218 from sets of genomes representing multiple taxonomic levels across eukaryotes (Fig S5) from the  
219 ORTHODB database [43].

220

221 To further examine which genes have been lost in the genomes of FEL and SEL species relative  
222 to other representative Saccharomycotina genomes, we conducted HMM-based sequence  
223 similarity searches using annotated *S. cerevisiae* genes as queries in HMM construction (see  
224 *Methods*) (Fig S6). Because we were most interested in identifying genes absent from the FEL  
225 and SEL, we focused our analyses on genes lost in at least two-thirds of each lineage (i.e.,  $\geq 11$   
226 FEL taxa or  $\geq 5$  SEL taxa). Using this criterion, we found that 1,409 and 771 genes have been  
227 lost in the FEL and SEL, respectively (Fig 2A). Among the genes lost in each lineage, 748 genes  
228 were lost across both lineages, 661 genes have been uniquely lost in the FEL, and 23 genes have  
229 been uniquely lost in the SEL (File S3).

230

231 To identify the likely functions of genes lost from each lineage, we conducted GO enrichment  
232 analyses. Examination of significantly over-represented GO terms for the sets of genes that have  
233 been lost in *Hanseniaspora* genomes revealed numerous categories related to metabolism (e.g.,  
234 MALTOSE METABOLIC PROCESS, GO:0000023,  $p = 0.006$ ; SUCROSE ALPHA-GLUCOSIDASE  
235 ACTIVITY, GO:0004575,  $p = 0.003$ ) and genome-maintenance processes (e.g., MEIOTIC CELL  
236 CYCLE, GO:0051321,  $p < 0.001$ ) (File S4). Additional terms, such as CELL CYCLE, GO:0007049  
237 ( $p < 0.001$ ), CHROMOSOME SEGREGATION, GO:0007059 ( $p < 0.001$ ), CHROMOSOME  
238 ORGANIZATION, GO:0051276 ( $p = 0.009$ ), and DNA-DIRECTED DNA POLYMERASE ACTIVITY,

239 GO:0003887 ( $p < 0.001$ ), were significantly over-represented among genes absent only in the  
240 FEL. Next, we examined in more detail the identities and likely functional consequences of  
241 extensive gene losses across *Hanseniaspora* associated with metabolism, cell cycle, and DNA  
242 repair.

243  
244 *Metabolism-associated gene losses.* Examination of the genes causing over-  
245 representation of metabolism-associated GO terms revealed gene losses in the *IMA* gene family  
246 and the *MAL* loci, both of which are associated with growth primarily on maltose but can also  
247 facilitate growth on sucrose, raffinose, and melezitose [44,45]. All *IMA* genes have been lost in  
248 *Hanseniaspora*, whereas *MALx3*, which encodes the *MAL*-activator protein [46] has been lost in  
249 all but one species (*Hanseniaspora jakobsenii*; Fig 2B). Consistent with these losses,  
250 *Hanseniaspora* species cannot grow on the carbon substrates associated with these genes (i.e.,  
251 maltose, raffinose, and melezitose) with the exception of *H. jakobsenii*, which has weak/delayed  
252 growth on maltose (Fig 2B; File S5). The growth of *H. jakobsenii* on maltose may be due to a  
253 cryptic  $\alpha$ -glucosidase gene or represent a false positive, as *MALx2* encodes the required enzyme  
254 for growth on maltose and is absent in *H. jakobsenii*. Because these genes are also associated  
255 with growth on sucrose in some species [44], we also examined their ability to grow on this  
256 substrate. In addition to the *MAL* loci conferring growth on sucrose, the invertase *Suc2* can also  
257 break down sucrose into glucose and fructose [47]. We found that FEL yeasts have lost *SUC2*  
258 and are unable to grow on sucrose, while SEL yeasts have *SUC2* and are able to grow on this  
259 substrate (Fig 2B; File S5). Altogether, patterns of gene loss are consistent with known metabolic  
260 traits.

261

262 Examination of gene sets associated with growth on other carbon substrates revealed that  
263 *Hanseniaspora* species also cannot grow on galactose, consistent with the loss of one or more of  
264 the three genes involved in galactose assimilation (*GAL1*, *GAL7*, and *GAL10*) from their  
265 genomes (Fig 2C; File S5). Additionally, all *Hanseniaspora* genomes appear to have lost two  
266 key genes, *PCK1* and *FBP1*, encoding enzymes in the gluconeogenesis pathway (Fig S7A and  
267 S7C); in contrast, all *Hanseniaspora* have an intact glycolysis pathway (Fig S7B and S7D).

268  
269 Manual examination of other metabolic pathways revealed that *Hanseniaspora* genomes are also  
270 missing some of their key genes. For example, we found that THIAMINE BIOSYNTHETIC PROCESS,  
271 GO:0009228 ( $p = 0.003$ ), was an over-represented GO term among genes missing in both the  
272 FEL and SEL due to the absence of *THI* and *SNO* family genes. Further examination of genes  
273 present in the thiamine biosynthesis pathway revealed extensive gene loss (Fig 2D), which is  
274 consistent with their inability to grow on vitamin-free media [45] (File S5). Notably,  
275 *Hanseniaspora* are still predicted to be able to import extracellular thiamine via Thi73 and  
276 convert it to its active cofactor via Thi80, which may explain why they can rapidly consume  
277 thiamine [39]. Similarly, examination of amino acid biosynthesis pathways revealed the  
278 methionine salvage pathway was also largely disrupted by gene losses across all *Hanseniaspora*  
279 (Fig 2E). Lastly, we found that *GDH1* and *GDH3* from the glutamate biosynthesis pathway from  
280 ammonium are missing in FEL yeasts (File S3). However, *Hanseniaspora* have *GLT1*, which  
281 enables glutamate biosynthesis from glutamine.

282  
283 *Cell cycle and genome integrity-associated gene losses.* Many genes involved in cell  
284 cycle and genome integrity, including cell cycle checkpoint genes, have been lost across

285 *Hanseniaspora* (Fig 3). For example, *WHI5* and *DSE2*, which are responsible for repressing the  
286 Start (i.e., an event that determines cells have reached a critical size before beginning division)  
287 [48] and help facilitate daughter-mother cell separation through cell wall degradation [49], have  
288 been lost in both lineages. Additionally, the FEL has lost the entirety of the DASH complex (i.e.,  
289 *ASK1*, *DAD1*, *DAD2*, *DAD3*, *DAD4*, *DUO1*, *DAMI*, *HSK3*, *SPC19*, and *SPC34*), which forms  
290 part of the kinetochore and functions in spindle attachment and stability, as well as chromosome  
291 segregation, and the MIND complex (i.e., *MTW1*, *NNF1*, *NSL1*, and *DSN1*), which is required  
292 for kinetochore bi-orientation and accurate chromosome segregation (File S3 and S4). Similarly,  
293 FEL species have lost *MAD1* and *MAD2*, which are associated with spindle checkpoint processes  
294 and have abolished checkpoint activity when their encoded proteins are unable to dimerize [14].  
295 Lastly, components of the anaphase-promoting complex, a major multi-subunit regulator of the  
296 cell cycle, are lost in both lineages (i.e., *CDC26* and *MND2*) or just the FEL (i.e., *APC2*, *APC4*,  
297 *APC5*, and *SWM1*).

298  
299 Another group of genes that have been lost in *Hanseniaspora* are genes associated with the DNA  
300 damage checkpoint and DNA damage sensing. For example, both lineages have lost *RFX1*,  
301 which controls a late point in the DNA damage checkpoint pathway [50], whereas the FEL has  
302 lost *MEC3* and *RAD9*, which encode checkpoint proteins required for arrest in the G2 phase after  
303 DNA damage has occurred [17]. Since losses in DNA damage checkpoints and dysregulation of  
304 spindle checkpoint processes are associated with genomic instability, we next evaluated the  
305 ploidy of *Hanseniaspora* genomes [51]. Using base frequency plots, we found that the ploidy of  
306 genomes of FEL species ranges between 1 and 3, with evidence suggesting that certain species,  
307 such as *H. singularis*, *H. pseudoguilliermondii*, and *H. jakobsenii*, are potentially aneuploid (Fig

308 S8). In contrast, the genomes of SEL species have ploidies of 1-2 with evidence of potential  
309 aneuploidy observed only in *H. occidentalis* var. *citrica*. Greater variance in ploidy and  
310 aneuploidy in the FEL compared to the SEL may be due to the FEL's loss of a greater number of  
311 components of the anaphase-promoting complex (APC), whose dysregulation is thought to  
312 increase instances of aneuploidy [52].

313

314 *Pronounced losses of DNA repair genes in the FEL.* Examination of other GO-enriched  
315 terms revealed numerous genes associated with diverse DNA repair processes that have been lost  
316 among *Hanseniaspora* species, and especially the FEL (Fig 4). We noted 14 lost DNA repair  
317 genes across all *Hanseniaspora*, including the DNA glycosylase gene *MAG1* [53], the photolyase  
318 gene *PHR1* that exclusively repairs pyrimidine dimers [23], and the diphosphatase gene *PCDI*, a  
319 key contributor to the purging of mutagenic nucleotides, such as 8-oxo-dGTP, from the cell [24].  
320 An additional 33 genes were lost specifically in the FEL such as *TDPI*, which repairs damage  
321 caused by topoisomerase activity [54]; the DNA polymerase gene *POL32* that participates in  
322 base-excision and nucleotide-excision repair and whose null mutants have increased genomic  
323 deletions [20]; and the *CDC13* gene that encodes a telomere-capping protein [55].

324

### 325 **FEL gene losses are associated with accelerated sequence evolution**

326 *Loss of DNA repair genes is associated with a burst of sequence evolution.* To examine  
327 the mutational signatures of losing numerous DNA repair genes on *Hanseniaspora* substitution  
328 rates, we tested several different hypotheses that postulated changes in the ratio of the rate of  
329 nonsynonymous (dN) to the rate of synonymous substitutions (dS) (dN/dS or  $\omega$ ) along the  
330 phylogeny (Table 1; Fig 5). For each hypothesis tested, the null was that the  $\omega$  value remained

331 constant across all branches of the phylogeny. Examination of the hypothesis that the  $\omega$  values of  
332 both the FEL and SEL stem branches were distinct from the background  $\omega$  value ( $H_{FE-SE \text{ branch}}$ ;  
333 Fig 5B), revealed that 678 genes (68.55% of examined genes) significantly rejected the null  
334 hypothesis (Table 1;  $\alpha = 0.01$ ; LRT; median FEL stem branch  $\omega = 0.57$ , median SEL stem  
335 branch  $\omega = 0.29$ , and median background  $\omega = 0.060$ ). Examination of the hypothesis that the  $\omega$   
336 value of the FEL stem branch and the  $\omega$  value of the FEL crown branches were distinct from the  
337 background  $\omega$  value ( $H_{FE}$ ; Fig 5C) revealed 743 individual genes (75.13% of examined genes)  
338 that significantly rejected the null hypothesis (Table 1;  $\alpha = 0.01$ ; LRT; median FEL stem branch  
339  $\omega = 0.71$ , median FEL crown branches  $\omega = 0.06$ , median background  $\omega = 0.063$ ). Testing the  
340 same hypothesis for the SEL ( $H_{SE}$ ; Fig 5D) revealed 528 individual genes (53.7% of examined  
341 genes) that significantly rejected the null hypothesis (Table 1;  $\alpha = 0.01$ ; LRT; median SEL stem  
342 branch  $\omega = 0.267$ , median SEL crown branches  $\omega = 0.074$ , median background  $\omega = 0.059$ ).  
343 Finally, testing of the hypothesis that the FEL and SEL crown branches have  $\omega$  values distinct  
344 from each other and the background ( $H_{FE-SE \text{ crown}}$ ; Fig 5E) revealed 717 genes (72.5% of  
345 examined genes) that significantly rejected the null hypothesis (Table 1;  $\alpha = 0.01$ ; LRT; median  
346 FEL crown branches  $\omega = 0.062$ , median SEL crown branches  $\omega = 0.074$ , median background  $\omega =$   
347 0.010). These results suggest a dramatic, genome-wide increase in evolutionary rate in the FEL  
348 stem branch (Fig 5B and 5C), which coincided with the loss of a large number of genes involved  
349 in DNA repair.

350

351 *The FEL has a greater number of base substitutions and indels.* To better understand  
352 the mutational landscape in the FEL and SEL, we characterized patterns of base substitutions  
353 across the 1,034 OGs. Focusing on first ( $n = 240,565$ ), second ( $n = 318,987$ ), and third ( $n =$



354 58,151) codon positions that had the same character state in all outgroup taxa, we first examined  
355 how many of these sites had experienced base substitutions in FEL and SEL species (Fig 6A).  
356 We found significant differences between the proportions of base substitutions in the FEL and  
357 SEL ( $F(1) = 196.88, p < 0.001$ ; Multi-factor ANOVA) at each codon position (first:  $p < 0.001$ ;  
358 second:  $p < 0.001$ ; and third:  $p = 0.02$ ; Tukey Honest Significance Differences post-hoc test).  
359  
360 Examination of whether the observed base substitutions were AT- (i.e., G|C  $\rightarrow$  A|T) or GC- (i.e.,  
361 A|T  $\rightarrow$  G|C) biased revealed differences between the FEL and SEL ( $F(1) = 447.1, p < 0.001$ ;  
362 Multi-factor ANOVA), as well as between AT- and GC-bias ( $F(1) = 914.5, p < 0.001$ ; Multi-  
363 factor ANOVA) among sites with G|C ( $n = 232,546$ ) and A|T ( $n = 385,157$ ) pairs (Fig 6B).  
364 Specifically, we observed significantly more base substitutions in the FEL compared to the SEL  
365 and a significant bias toward A|T across both lineages ( $p < 0.001$  for both tests; Tukey Honest  
366 Significance Differences post-hoc test). Examination of transition / transversion ratios revealed a  
367 lower transition / transversion ratio in the FEL ( $0.67 \pm 0.02$ ) compared to the SEL ( $0.76 \pm 0.01$ )  
368 (Fig 6C;  $p < 0.001$ ; Wilcoxon Rank Sum test); this finding is in contrast to the transition /  
369 transversion ratios found in most known organisms, whose values are substantially above 1.00  
370 [56–59]. Altogether, these analyses reveal more base substitutions in the FEL and SEL across all  
371 codon positions and a significant AT-bias in base substitutions across all *Hanseniaspora*.  
372  
373 Examination of indels revealed that the total number of insertions or deletions was significantly  
374 greater in the FEL ( $\text{mean}_{\text{insertions}} = 7521.11 \pm 405.34$ ;  $\text{mean}_{\text{deletions}} = 3894.11 \pm 208.16$ ) compared  
375 to the SEL ( $\text{mean}_{\text{insertions}} = 6049.571 \pm 155.85$ ;  $\text{mean}_{\text{deletions}} = 2346.71 \pm 326.22$ ) (Fig 6D;  $p <$   
376  $0.001$  for both tests; Wilcoxon Rank Sum test). The difference in number of indels between the

377 FEL and SEL remained significant after taking into account indel size ( $F(1) = 2102.87, p <$   
378  $0.001$ ; Multi-factor ANOVA). Further analyses revealed there are significantly more insertions  
379 in the FEL compared to the SEL for insertion sizes 3-18 bp ( $p < 0.001$  for all comparisons  
380 between each lineage for each insertion size; Tukey Honest Significance Differences post-hoc  
381 test), while there were significantly more deletions in the FEL compared to the SEL for deletion  
382 sizes 3-21 bp ( $p < 0.001$  for all comparisons between each lineage for each deletion size; Tukey  
383 Honest Significance Differences post-hoc test). These analyses suggest that there are  
384 significantly more indels in the FEL compared to the SEL and that this pattern is primarily  
385 driven by short indels.

386

### 387 **Greater sequence instability in the FEL and signatures of endogenous and exogenous DNA** 388 **damage**

389 *The FEL has greater instability of homopolymers.* Examination of the total proportion  
390 of mutated bases among homopolymers (i.e., (substituted bases + deleted bases + inserted bases)  
391 / total homopolymer bases) revealed significant differences between the FEL and SEL (Fig 6G;  
392  $F(1) = 27.68, p < 0.001$ ; Multi-factor ANOVA). Although the FEL had a higher proportion of  
393 mutations among homopolymers across all sizes of two ( $n = 17,391$ ), three ( $n = 1,062$ ), four ( $n =$   
394  $104$ ), and five ( $n = 5$ ), significant differences were observed for homopolymers of length two and  
395 three ( $p = 0.02$  and  $p = 0.003$ , respectively; Tukey Honest Significance Differences post-hoc). To  
396 gain more insight into the drivers differentiating mutational load in homopolymers, we  
397 considered the additional factors of homopolymer sequence type (i.e., A|T or C|G) and mutation  
398 type (i.e., base substitution, insertion, or deletion) (Fig S9). In addition to recapitulating  
399 differences between the types of mutations that occur at homopolymers ( $F(2) = 1686.70, p <$

400 0.001; Multi-factor ANOVA), we observed that base substitutions occurred more frequently than  
401 insertions and deletions ( $p < 0.001$  for both tests; Tukey Honest Significance Differences post-  
402 hoc test). For example, among A|T and C|G homopolymers of length two and C|G  
403 homopolymers of length three, base substitutions were higher in the FEL compared to the SEL ( $p$   
404 = 0.009,  $p < 0.001$ , and  $p < 0.001$ , respectively; Tukey Honest Significance Differences post-hoc  
405 test). Additionally, there were significantly more base substitutions in A|T homopolymers of  
406 length five in the FEL compared to the SEL ( $p < 0.001$ ; Tukey Honest Significance Differences  
407 post-hoc test). Altogether, these analyses reveal greater instability of homopolymers in the FEL  
408 compared to the SEL due to more base substitutions.

409

410 *The FEL has a stronger signature of endogenous DNA damage from 8-oxo-dG.* Examination  
411 of mutational signatures associated with common endogenous and exogenous mutagens revealed  
412 greater signatures of mutational load in the FEL compared to the SEL, as well as in both FEL  
413 and SEL compared to the outgroup taxa. The oxidatively damaged guanine base, 8-oxo-dG, is a  
414 commonly observed endogenous form of DNA damage that causes the transversion mutation of  
415  $G \rightarrow T$  or  $C \rightarrow A$  [26]. Examination of the direction of base substitutions among all sites with a  
416 G base in all outgroup taxa revealed differences in the direction of base substitutions ( $F(2) =$   
417 5,682,  $p < 0.001$ ; Multi-factor ANOVA). Moreover, there are significantly more base  
418 substitutions at G sites associated with 8-oxo-dG damage in the FEL compared to the SEL (Fig  
419 6H;  $p < 0.001$ ; Tukey Honest Significance Differences post-hoc test). These analyses reveal that  
420 FEL genomes have higher proportions of G site substitutions associated with the mutational  
421 signature of a common endogenous mutagen.

422

423 *Hanseniaspora* have a greater genomic signature of UV-damage. Both the FEL and SEL have  
424 lost *PHR1*, a gene encoding a DNA photolyase that repairs pyrimidine dimers, so we next  
425 examined the genomes for evidence of a CC → TT dinucleotide substitution bias, an indirect  
426 molecular signature of UV radiation damage (Fig 6I). To do so, we used a CC|GG and TT|AA  
427 score, which quantifies the abundance of CC|GG and TT|AA dinucleotides in a genome and  
428 corrects for the total number of dinucleotides and GC content in the same genome. When  
429 comparing CC|GG scores between the FEL, SEL, and outgroup taxa, there were no significant  
430 differences ( $\chi^2(2) = 5.96, p = 0.051$ ; Kruskal-Wallis rank sum test). When comparing all  
431 *Hanseniaspora* to the outgroup, we found that the CC|GG score was significantly lower in  
432 *Hanseniaspora* ( $p = 0.03$ ; Wilcoxon Rank Sum test). Examination of TT|AA scores revealed  
433 significant differences between the three groups ( $\chi^2(2) = 8.84, p = 0.012$ ; Kruskal-Wallis rank  
434 sum test), which was driven by differences between the FEL and SEL compared to the outgroup  
435 ( $p = 0.011$  and  $0.016$ , respectively; Dunn's test for multiple comparisons with Benjamini-  
436 Hochberg multi-test correction). The same result was observed when comparing all  
437 *Hanseniaspora* to the outgroup ( $p < 0.001$ ; Wilcoxon Rank Sum test). Altogether, these analyses  
438 suggest *Hanseniaspora* have a greater signal of UV damage compared to other budding yeasts.  
439  
440 Lastly, we examined if all of these mutations were associated with more radical amino acid  
441 changes in the FEL compared to the SEL using two measures of amino acid change: Sneath's  
442 index [60] and Epstein's coefficient of difference [61]. For both measures, we observed  
443 significantly more radical amino acid substitutions in the FEL compared to the SEL (Fig S10;  $p$   
444  $< 0.001$ ; Wilcoxon Rank Sum test for both metrics). Altogether, these analyses reveal greater

445 DNA sequence instability in the FEL compared to the SEL, which is also associated with more  
446 radical amino acid substitutions.

447

## 448 **Discussion**

449 The genus *Hanseniaspora* has been recently observed to exhibit the longest branches among  
450 budding yeasts (Fig 1) [33–35], and their genomes have some of the lowest numbers of genes,  
451 lowest GC contents, and smallest assembly sizes in the subphylum (Fig S1). Through the  
452 analysis of the genomes of nearly every known *Hanseniaspora* species this study presents  
453 multiple lines of evidence suggesting that one lineage of *Hanseniaspora*, which we have named  
454 FEL, is a lineage of long-term, hypermutator species that have undergone extensive gene loss  
455 (Figs. 1-4).

456

457 Evolution by gene loss is gaining increasing attention as a major mode of genome evolution  
458 [34,62] and is mainly possible due to the dispensability of the majority of genes. For example,  
459 90% of *E. coli* [63], 80% of *S. cerevisiae* [64], and 73% of *Candida albicans* [65] genes are  
460 dispensable in laboratory conditions. The loss of dispensable genes can be selected for [66] and  
461 is common in lineages of obligate parasites or symbionts, such as in the microsporidia,  
462 intracellular fungi which have lost key metabolic pathways such as amino acid biosynthesis  
463 pathways [67,68], and myxozoa, a group of cnidarian obligate parasites that infect vertebrates  
464 and invertebrates [69]. Similar losses are also increasingly appreciated in free-living organisms,  
465 such as the budding yeasts (this study; Hittinger et al., 2004; Riley et al., 2016; Shen et al., 2018;  
466 Slot and Rokas, 2010; Wolfe et al. 2015) and animals [62]. For example, a gene known to enable

467 sucrose utilization, *SUC2* [47], is lost in the FEL and reflects an inability to grow on sucrose,  
468 while the *SUC2* is present in the SEL and reflects an ability to grow on sucrose (Fig 2).

469

470 However, *Hanseniaspora* species have experienced not just the typically observed losses of  
471 metabolic genes (Figs. 2A and 2B), but more strikingly, the atypical loss of dozens of cell cycle  
472 and DNA damage, response, and repair genes (Figs. 3 and 4). Losses of cell cycle genes are  
473 extremely rare [11], and most such losses are known in the context of cancers [73]. Losses of  
474 individual or a few DNA repair genes have also been observed in individual hypermutator fungal  
475 isolates [6–8]. In contrast, the *Hanseniaspora* losses of cell cycle and DNA repair genes are not  
476 only unprecedented in terms of the numbers of genes lost and their striking impact on genome  
477 sequence evolution, but also in terms of the evolutionary longevity of the lineage.

478

479 *Missing checkpoint processes are associated with fast growth and bipolar budding.*

480 *Hanseniaspora* species lost numerous components of the cell cycle (Fig 3), such as *WHI5*, which  
481 causes accelerated G1/S transitions in knock-out *S. cerevisiae* strains [12,48], as well as  
482 components of APC (i.e., *CDC26* and *MND2*), which may accelerate the transition to anaphase  
483 [13]. These and other cell cycle gene losses are suggestive of rapid cell division and growth and  
484 consistent with the known ability of *Hanseniaspora* yeast of rapid growth in the wine  
485 fermentation environment [40].

486

487 One of the distinguishing characteristics of the *Hanseniaspora* cell cycle is bipolar budding,  
488 which is known only in the genera *Wickerhamia* (Debaryomycetaceae) and *Nadsonia*  
489 (Dipodascaceae), as well as in *Hanseniaspora* and its sister genus *Saccharomycodes* (both in the

490 family Saccharomycodaceae) [45][74]. These three lineages are distantly related to one another  
491 on the budding yeast phylogeny [34], so bipolar budding likely evolved three times  
492 independently in Saccharomycotina, including in the last common ancestor of *Hanseniaspora*  
493 and *Saccharomyces*. Currently, there is only one genome available for *Saccharomyces* [74],  
494 making robust inferences of ancestral states challenging. Interestingly, examination of cell cycle  
495 gene presence and absence in the only representative genome from the genus, *Saccharomyces*  
496 *ludwigii* [74], reveals that *CDC26*, *PCL1*, *PDS1*, *RFX1*, *SIC1*, *SPO12*, and *WHI5* are absent (File  
497 S6), most of which are either absent from all *Hanseniaspora* (i.e., *CDC26*, *RFX1*, *SPO12*, and  
498 *WHI5*) or just from the FEL (i.e., *PDS1* and *SIC1*). This evidence raises the hypothesis that  
499 bipolar budding is linked to the dysregulation of cell cycle processes due to the absence of cell  
500 cycle genes and in particular cell cycle checkpoints (Fig 3).

501  
502 *Some gene losses may be compensatory.* Deletion of many of the genes associated with DNA  
503 maintenance that have been lost in *Hanseniaspora* lead to dramatic increases of mutation rates  
504 and gross genome instability [12,13,20], raising the question of how these gene losses were  
505 tolerated in the first place. Examination of the functions of the genes lost in *Hanseniaspora*  
506 suggests that at least some of these gene losses may have been compensatory. For example,  
507 *POL4* knock-out strains of *S. cerevisiae* can be rescued by the deletion of *YKU70* [75], both of  
508 which were lost in the FEL. Similarly, the loss of genes responsible for key cell cycle functions  
509 (e.g., kinetochore functionality and chromosome segregation) appears to have co-occurred with  
510 the loss of checkpoint genes responsible for delaying the cell cycle if its functions fail to  
511 complete, which may have allowed *Hanseniaspora* cells to bypass otherwise detrimental cell  
512 cycle arrest. Specifically, *MAD1* and *MAD2*, which help delay anaphase when kinetochores are

513 unattached [14]; the 10-gene DASH complex, which participates in spindle attachment, stability,  
514 and chromosome segregation [76]; and the 4-gene MIND complex, which is required for  
515 kinetochore bi-orientation and accurate chromosome segregation [77], were all lost in the FEL.

516  
517 *Long-term hypermutation and the subsequent slowing of sequence evolution.* Estimates of  $\omega$   
518 suggest the FEL and SEL, albeit to a much lower degree in the latter, underwent a burst of  
519 accelerated sequence evolution in their stem lineages, followed by a reduction in the pace of  
520 sequence evolution (Fig 5). This pattern is consistent with theoretical predictions that selection  
521 against mutator phenotypes will reduce the overall rate of sequence evolution [27], as well as  
522 with evidence from experimental evolution of hypermutator lines of *S. cerevisiae* that showed  
523 that their mutation rates were quickly reduced [32]. Although we do not know the catalyst for  
524 this burst of sequence evolution, hypermutators may be favored in maladapted populations or in  
525 conditions where environmental parameters frequently change [27,32]. Although the  
526 environment occupied by the *Hanseniaspora* last common ancestor is unknown, it is plausible  
527 that environmental instability or other stressors favored hypermutators in *Hanseniaspora*. Extant  
528 *Hanseniaspora* species are well known to be associated with the grape environment [39,78,79].  
529 Interestingly, grapes appear to have originated [80] around the same time window that  
530 *Hanseniaspora* did (Fig 1B), leading us to speculate that the evolutionary trigger of  
531 *Hanseniaspora* hypermutation could have been adaptation to the grape environment.

532  
533 *Losses of DNA repair genes are reflected in patterns of sequence evolution.* Although the  
534 relationship between genotype and phenotype is complex, the loss of genes involved in DNA  
535 repair can have predictable outcomes on patterns of sequence evolution in genomes. In the case



536 of the observed losses of DNA repair genes in *Hanseniaspora*, the mutational signatures of this  
537 loss and the consequent hypermutation can be both general (i.e., the sum total of many gene  
538 losses), as well as specific (i.e., can be putatively linked to the losses of specific genes or  
539 pathways). Arguably the most notable general mutational signature is that *Hanseniaspora*  
540 genome sequence evolution is largely driven by random (i.e., neutral) mutagenic processes with  
541 a strong AT-bias. For example, whereas the transition / transversion ratios of eukaryotic  
542 genomes are typically within the 1.7 and 4 range [56–59], *Hanseniaspora* ratios are ~0.66-0.75  
543 (Fig 6C), which are values on par with estimates of transition / transversion caused by neutral  
544 mutations alone (e.g., 0.6-0.95 in *S. cerevisiae* [56,81], 0.92 in *E. coli* [82], 0.98 in *Drosophila*  
545 *melanogaster* [83], and 1.70 in humans [84]). Similarly, base substitutions across *Hanseniaspora*  
546 genomes are strongly AT-biased, especially in the FEL (Fig 6), an observation consistent with  
547 the general AT-bias of mutations observed in diverse organisms, including numerous bacteria  
548 [85], the fruit fly [83], *S. cerevisiae* [56], and humans [84].

549  
550 In addition to these general mutational signatures, examination of *Hanseniaspora* sequence  
551 evolution also reveals mutational signatures that can be linked to the loss of specific DNA repair  
552 genes. For example, we found a higher proportion of base substitutions associated with the most  
553 abundant oxidatively damaged base, 8-oxo-dG, which causes G → T or C → A transversions  
554 [26], in the FEL compared to the SEL, which reflects specific gene losses. Specifically,  
555 *Hanseniaspora* yeasts have lost *PCDI*, which encodes a diphosphatase that contributes to the  
556 removal of 8-oxo-dGTP [24] and thereby reduces the chance of misincorporating this damaged  
557 base. Once 8-oxo-dG damage has occurred, it is primarily repaired by the base excision repair  
558 pathway [26]. Notably, the FEL is missing a key component of the base excision repair pathway,

559 a DNA polymerase  $\delta$  subunit, encoded by *POL32*, which aids in filling the gap after excision  
560 [86]. Accordingly, the proportion of G|C sites with substitutions indicative of 8-oxo-dG damage  
561 (i.e., G  $\rightarrow$  T or C  $\rightarrow$  A transversions) is significantly greater in the FEL compared to the SEL  
562 (Fig 5H). Similarly, the numbers of dinucleotide substitutions of CC  $\rightarrow$  TT associated with UV-  
563 induced pyrimidine dimers [87] are higher across *Hanseniaspora* compared to other yeasts due  
564 to the loss of *PHRI*, which encodes a DNA photolyase that repairs pyrimidine dimers (Fig 5I)  
565 [23].

566  
567 Our analyses provide the first major effort to characterize the genome function and evolution of  
568 the enigmatic genus *Hanseniaspora* and identify major and extensive losses of genes associated  
569 with metabolism, cell cycle, and DNA repair processes. These extensive losses and the  
570 concomitant acceleration of evolutionary rate mean that levels of amino acid sequence  
571 divergence within each of the two *Hanseniaspora* lineages alone, but especially within the FEL,  
572 are similar to those observed within plant classes and animal subphyla (Fig S11). These  
573 discoveries set the stage for further fundamental molecular and evolutionary investigations  
574 among *Hanseniaspora*, such as potential novel rewiring of cell cycle and DNA repair processes.  
575

## 576 **Methods**

577 **DNA sequencing** For each species, genomic DNA (gDNA) was isolated using a two-step  
578 phenol:chloroform extraction previously described to remove additional proteins from the gDNA  
579 [34]. The gDNA was sonicated and ligated to Illumina sequencing adaptors as previously  
580 described [88], and the libraries were submitted for paired-end sequencing (2 x 250) on an  
581 Illumina HiSeq 2500 instrument.

582

583 **Phenotyping** We qualitatively measured growth of species on five carbon sources (maltose,  
584 raffinose, sucrose, melezitose, and galactose) as previously described in [34]. We used a minimal  
585 media base with ammonium sulfate and all carbon sources were at a 2% concentration. Yeast  
586 were initially grown in YPD and transferred to carbon treatments. Species were visually scored  
587 for growth for about a week on each carbon source in three independent replicates over multiple  
588 days. A species was considered to utilize a carbon source if it showed growth across  $\geq 50\%$  of  
589 biological replicates. Growth data for *Hanseniaspora gamundiae* were obtained from Čadež et  
590 al., 2019.

591

592 **Genome assembly and annotation** To generate *de novo* genome assemblies, we used paired-  
593 end DNA sequence reads as input to iWGS, version 1.1 [89], a pipeline which uses multiple  
594 assemblers and identifies the “best” assembly according to largest genome size and N50 (i.e., the  
595 shortest contig length among the set of the longest contigs that account for 50% of the genome  
596 assembly’s length) [90] as described in [34]. More specifically, sequenced reads were first  
597 quality-trimmed, and adapter sequences were removed using TRIMMOMATIC, version 0.33 [91],  
598 and LIGHTER, version 1.1.1 [92]. Subsequently, KMergenIE, version 1.6982 [93], was used to  
599 determine the optimal *k*-mer length for each genome individually. Thereafter, six *de novo*  
600 assembly tools (i.e., ABYSS, version 1.5.2 [94]; DISCOVAR, release 51885 [95]; MASURCA,  
601 version 2.3.2 [96]; SGA, version 0.10.13 [97]; SOAPdenovo2, version 2.04 [98]; and SPAdes,  
602 version 3.7.0 [99]) were used to generate genome assemblies from the processed reads. Using  
603 QUAST, version 4.4 [100], the best assembly was chosen according to the assembly that  
604 provided the largest genome size and best N50.

605  
606 Annotations for eight of the *Hanseniaspora* genomes (i.e., *H. clermontiae*, *H. osmophila* CBS  
607 313, *H. pseudoguilliermondii*, *H. singularis*, *H. uvarum* DSM2768, *H. valbyensis*, *H. vineae* T02  
608 19AF, and *K. hatyaiensis*) and the four outgroup species (i.e., *Cy. jadinii*, *K. marxianus*, *S.*  
609 *cerevisiae*, and *W. anomalus*) were generated in a recent comparative genomic study of the  
610 budding yeast subphylum [34]. The other 11 *Hanseniaspora* genomes examined here were  
611 annotated by following the same protocol as in [34].

612  
613 In brief, the genomes were annotated using the MAKER pipeline, version 2.31.8 [101]. The  
614 homology evidence used for MAKER consists of fungal protein sequences in the SwissProt  
615 database (release 2016\_11) and annotated protein sequences of select yeast species from  
616 MYCOCOSM [102], a web portal developed by the US Department of Energy Joint Genome  
617 Institute for fungal genomic analyses. Three *ab initio* gene predictors were used with the  
618 MAKER pipeline, including GENEMARK-ES, version 4.32 [103]; SNAP, version 2013-11-29  
619 [104]; and AUGUSTUS, version 3.2.2 [105], each of which was trained for each individual  
620 genome. GENEMARK-ES was self-trained on the repeat-masked genome sequence with the  
621 fungal-specific option (“-fugus”), while SNAP and AUGUSTUS were trained through three  
622 iterative MAKER runs. Once all three *ab initio* predictors were trained, they were used together  
623 with homology evidence to conduct a final MAKER analysis in which all gene models were  
624 reported (“keep\_preds” set to 1), and these comprise the final set of annotations for the genome.

625  
626 *Data acquisition* All publicly available *Hanseniaspora* genomes, including multiple strains  
627 from a single species, were downloaded from NCBI (<https://www.ncbi.nlm.nih.gov/> File S1).

628 These species and strains include *H. guilliermondii* UTAD222 [78], *H. opuntiae* AWRI3578, *H.*  
629 *osmophila* AWRI3579, *H. uvarum* AWRI3580 [106], *H. uvarum* 34-9, *H. vineae* T02-19AF  
630 [107], *H. valbyensis* NRRL Y-1626 [33], and *H. gamundiae* [41]. We also included  
631 *Saccharomyces cerevisiae* S288C, *Kluyveromyces marxianus* DMKU3-1042, *Wickerhamomyces*  
632 *anomalus* NRRL Y-366-8, and *Cyberlindnera jadinii* NRRL Y-1542, four representative  
633 budding yeast species that are all outside the genus *Hanseniaspora* [34], which we used as  
634 outgroups. Together with publicly available genomes, our sampling of *Hanseniaspora*  
635 encompasses all known species in the genus (or its anamorphic counterpart, *Kloeckera*), except  
636 *Hanseniaspora lindneri*, which likely belongs to the FEL based on a four-locus phylogenetic  
637 study [108], and *Hanseniaspora taiwanica*, which likely belongs to the SEL based on neighbor-  
638 joining analyses of the LSU rRNA gene sequence [109].

639

640 **Assembly assessment and identification of orthologs** To determine genome assembly  
641 completeness, we calculated contig N50 [90] and assessed gene content completeness using  
642 multiple databases of curated orthologs from BUSCO, version 3 [110]. More specifically, we  
643 determined gene content completeness using orthologous sets of genes constructed from sets of  
644 genomes representing multiple taxonomic levels, including Eukaryota (superkingdom; 100  
645 species; 303 BUSCOs), Fungi (kingdom; 85 species; 290 BUSCOs), Dikarya (subkingdom; 75  
646 species; 1,312 BUSCOs), Ascomycota (phylum; 75 species; 1,315 BUSCOs), Saccharomyceta  
647 (no rank; 70 species; 1,759 BUSCOs), and Saccharomycetales (order; 30 species; 1,711  
648 BUSCOs).

649

650 Genomes sequenced in the present project were sequenced at an average depth of  $63.49 \pm 52.57$   
651 (File S1). Among all *Hanseniaspora*, the average scaffold N50 was  $269.03 \pm 385.28$  kb, the  
652 average total number of scaffolds was  $980.36 \pm 835.20$  ( $398.32 \pm 397.97$  when imposing a 1kb  
653 scaffold filter), and the average genome assembly size was  $10.13 \pm 1.38$  Mb ( $9.93 \pm 1.35$  Mb  
654 when imposing a 1kb scaffold filter). Notably, the genome assemblies and gene annotations  
655 created in the present project were comparable to publicly available ones. For example, the  
656 genome size of publicly available *Hanseniaspora vineae* T02 19AF is 11.38 Mb with 4,661  
657 genes, while our assembly of *Hanseniaspora vineae* NRRL Y-1626 was 11.15 Mb with 5,193  
658 genes.

659  
660 We found that our assemblies were of comparable quality to those from publicly available  
661 genomes. For example, *Hanseniaspora uvarum* NRRL Y-1614 (N50 = 267.64 kb; genome size =  
662 8.82 Mb; number of scaffolds = 258; gene number = 4,227), which was sequenced in the present  
663 study, and *H. uvarum* AWRI3580 (N50 = 1,289.09 kb; genome size = 8.81 Mb; number of  
664 scaffolds = 18; gene number = 4,061), which is publicly available [106] had similar single-copy  
665 BUSCO genes present in the highest and lowest ORTHODB [43] taxonomic ranks (Eukaryota and  
666 Saccharomycetales, respectively). Specifically, *H. uvarum* NRRL Y-1614 and *H. uvarum*  
667 AWRI3580 had 80.20% (243 / 303) and 79.87% (242 / 303) of universally single-copy  
668 orthologs in Eukaryota present in each genome respectively, and 52.31% (895 / 1,711) and  
669 51.49% (881 / 1,711) of universally single-copy orthologs in Saccharomycetales present in each  
670 genome, respectively.

671

672 To identify single-copy orthologous genes (OGs) among all protein coding sequences for all 29  
673 taxa, we used ORTHOMCL, version 1.4 [111]. ORTHOMCL clusters genes into OGs using a  
674 Markov clustering algorithm (van Dongen, 2000; <https://micans.org/mcl/>) from gene similarity  
675 information acquired from a blastp ‘all-vs-all’ using NCBI’s BLAST+, version 2.3.0 (Fig S2;  
676 Madden, 2013) and the proteomes of species of interest as input. The key parameters used in  
677 blastp ‘all-vs-all’ were: e-value =  $1e^{-10}$ , percent identity cut-off = 30%, percent match cutoff =  
678 70%, and a maximum weight value = 180. To conservatively identify OGs, we used a strict  
679 ORTHOMCL inflation parameter of 4.

680

681 To identify additional OGs suitable for use in phylogenomic and molecular sequence analyses,  
682 we identified the single best putatively orthologous gene from OGs with full species  
683 representation and a maximum of two species with multiple copies using PHYLOTREEPRUNER,  
684 version 1.0 [114]. To do so, we first aligned and trimmed sequences in 1,143 OGs out a total of  
685 11,877 that fit the criterion of full representation and a maximum of two species with duplicate  
686 sequences. More specifically, we used MAFFT, version 7.294b [115], with the BLOSUM62 matrix  
687 of substitutions [116], a gap penalty of 1.0, 1,000 maximum iterations, the ‘genafpair’ parameter,  
688 and TRIMAL, version 1.4 [117], with the ‘automated1’ parameter to align and trim individual  
689 sequences, respectively. The resulting OG multiple sequence alignments were then used to infer  
690 gene phylogenies using FASTTREE, version 2.1.9 [118], with 4 and 2 rounds of subtree-prune-  
691 regraft and optimization of all 5 branches at nearest-neighbor interchanges, respectively, as well  
692 as the ‘slownni’ parameter to refine the inferred topology. Internal branches with support lower  
693 than 0.9 Shimodaira-Hasegawa-like support implemented in FASTTREE [118] were collapsed  
694 using PHYLOTREEPRUNER, version 1.0 [114], and the longest sequence for species with multiple

695 sequences per OG were retained, resulting a robust set of OGs with every taxon being  
696 represented by a single sequence. OGs were realigned (MAFFT) and trimmed (TRIMAL) using the  
697 same parameters as above.

698  
699 **Phylogenomic analyses** To infer the *Hanseniaspora* phylogeny, we performed  
700 phylogenetic inference using maximum likelihood [119] with concatenation [120,121] and  
701 coalescence [122] approaches. To determine the best-fit phylogenetic model for concatenation  
702 and generate single-gene trees for coalescence, we constructed trees per single-copy OG using  
703 RAXML, version 8.2.8. [123], where each topology was determined using 5 starting trees.  
704 Single-gene trees that did not recover all outgroup species as the earliest diverging taxa when  
705 serially rooted on outgroup taxa were discarded. Individual OG alignments or trees were used for  
706 species tree estimation with RAXML (i.e., concatenation) using the LG [124] model of  
707 substitution, which is the most commonly supported model of substitution (874 / 1,034; 84.53%  
708 genes), or ASTRAL-II, version 4.10.12 (i.e., coalescence; Mirarab and Warnow, 2015). Branch  
709 support for the concatenation and coalescence phylogenies was determined using 100 rapid  
710 bootstrap replicates [126] and local posterior support [122], respectively.

711  
712 Several previous phylogenomic studies have shown that the internal branches preceding the  
713 *Hanseniaspora* FEL and SEL are long [33,35]. To examine whether the relationship between the  
714 length of the internal branch preceding the FEL and the length of the internal branch preceding  
715 the SEL was consistent across genes in our phylogeny, we used NEWICK UTILITIES, version 1.6  
716 [127] to remove the 88 single-gene trees where either lineage was not recovered as monophyletic  
717 and calculated their difference for the remaining 946 genes.



718

719 **Estimating divergence times** To estimate divergence times among the 25 *Hanseniaspora*  
720 genomes, we used the Bayesian method MCMCTree in the PAML, version 4.9 [128], and the  
721 concatenated 1,034-gene matrix. The input tree was derived from the concatenation-based ML  
722 analysis under a single LG+G4 [124] model (Figure 1A). The in-group root (i.e., the split  
723 between the FEL and SEL) age was set between 0.756 and 1.177 time units (1 time unit = 100  
724 million years ago [mya]), which was adopted from a recent study [34].

725

726 To infer the *Hanseniaspora* timetree, we first estimated branch lengths under a single LG+G4  
727 [124] model with codeml in the PAML, version 4.9 [128], package and obtained a rough mean of  
728 the overall mutation rate. Next, we applied the approximate likelihood method [129,130] to  
729 estimate the gradient vector and Hessian matrix with Taylor expansion (option usedata = 3).  
730 Last, we assigned (a) the gamma-Dirichlet prior for the overall substitution rate (option  
731 rgene\_gamma) as G(1, 1.55), with a mean of 0.64, (b) the gamma-Dirichlet prior for the rate-  
732 drift parameter (option sigma2\_gamma) as G(1, 10), and (c) the parameters for the birth-death  
733 sampling process with birth and death rates  $\lambda=\mu=1$  and sampling fraction  $\rho=0$ . We employed the  
734 independent-rate model (option clock=2) to account for the rate variation across different  
735 lineages and used soft bounds (left and right tail probabilities equal 0.025) to set minimum and  
736 maximum values for the in-group root mentioned above. The MCMC run was first run for  
737 1,000,000 iterations as burn-in and then sampled every 1,000 iterations until a total of 30,000  
738 samples was collected. Two separate MCMC runs were compared for convergence, and similar  
739 results were observed.

740

741 **Gene presence and absence analysis** To determine the presence and absence of genes in  
742 *Hanseniaspora* genomes, we built hidden Markov models (HMMs) for each gene present in  
743 *Saccharomyces cerevisiae* and used the resulting HMM profile to search for the corresponding  
744 homolog in each *Hanseniaspora* genome, as well as outgroup taxa. More specifically, for each of  
745 the 5,917 verified open reading frames from *S. cerevisiae* [131] (downloaded Oct 2018 from the  
746 *Saccharomyces* genome database), we searched for putative homologs in NCBI's Reference  
747 Sequence Database for Fungi (downloaded June 2018) using NCBI's BLAST+, version 2.3.0  
748 [113], blastp function, and an e-value cut-off of  $1e^{-3}$  as recommended for homology searches  
749 [132]. We used the top 100 hits for the gene of interest and aligned them using MAFFT, version  
750 7.294b [115], with the same parameters described above. The resulting gene alignment was then  
751 used to create an HMM profile for the gene using the hmmbuild function in HMMER, version  
752 3.1b2 [133]. The resulting HMM profile was then used to search for each individual gene in each  
753 *Hanseniaspora* genome and outgroup taxa using the hmmsearch function with an expectation  
754 value cutoff of 0.01 and a score cutoff of 50. This analysis was done for the 5,735 genes with  
755 multiple blast hits allowing for the creation of a HMM profile. To evaluate the validity of  
756 constructed HMMs, we examined their ability to recall genes in *S. cerevisiae* and found that we  
757 recovered all nuclear genes. Altogether, our ability to recall 99.63% of genes demonstrates the  
758 validity of our pipeline for the vast majority of genes and for nuclear genes in particular.  
759  
760 To determine if any functional categories were over- or under-represented among genes present  
761 or absent among *Hanseniaspora* species, we conducted gene ontology (GO) [134] enrichment  
762 analyses using GOATOOLS, version 0.7.9 [135]. We used a background of all *S. cerevisiae*  
763 genes and a *p*-value cut-off of 0.05 after multiple-test correction using the Holm method [136].

764 Plotting gene presence and absence among pathways was done by examining depicted pathways  
765 available through the KEGG project [137] and the *Saccharomyces* Genome Database [131].

766  
767 We examined the validity of the gene presence and absence pipeline by examining under-  
768 represented terms and the presence or absence of essential genes in *S. cerevisiae* [138]. We  
769 hypothesized that under-represented GO terms will be associated with basic molecular processes  
770 and that essential genes will be under-represented among the set of absent genes. In agreement  
771 with these expectations, GO terms associated with basic biological processes and essential *S.*  
772 *cerevisiae* genes are under-represented among genes that are absent across *Hanseniaspora*  
773 genomes. For example, among all genes absent in the FEL and SEL, the molecular functions  
774 BASE PAIRING, GO:0000496 ( $p < 0.001$ ); GTP BINDING, GO:0005525 ( $p < 0.001$ ); and  
775 ATPASE ACTIVITY, COUPLED TO MOVEMENT OF SUBSTANCES, GO:0043492 ( $p <$   
776  $0.001$ ), are significantly under-represented (File S4). Similarly, *S. cerevisiae* essential genes are  
777 significantly under-represented ( $p < 0.001$ ; Fischer's exact test for both lineages) among lost  
778 genes with only 3 and 2 *S. cerevisiae* essential genes having been lost from the FEL and SEL  
779 genomes, respectively.

780  
781 **Ploidy estimation** To determine ploidy, we leveraged base frequency distributions at variable  
782 sites, which we generated by mapping each genome's reads to its assembly. To ensure high-  
783 quality read mapping, we first quality-trimmed reads using TRIMMOMATIC, version 0.36 [91],  
784 using the parameters leading:10, trailing:10, slidingwindow:4:20, and minlen:50. Reads were  
785 subsequently mapped to their respective genome using BOWTIE2, version 1.1.2 [139], with the  
786 "sensitive" parameter and converted the resulting file to a sorted bam format using SAMTOOLS,

787 version 1.3.1 [140]. We next used NQUIRE [141], which extracts base frequency information at  
788 segregating sites with a minimum frequency of 0.2. Prior to visualization, we removed  
789 background noise by utilizing the Gaussian Mixture Model with Uniform noise component  
790 [141].

791  
792 **Molecular evolution and mutation analysis**      *Molecular sequence rate analysis along the*

793 *phylogeny.*      To determine the rate of sequence evolution over the course of  
794 *Hanseniaspora* evolution, we examined variation in the rate of nonsynonymous (dN) to the rate  
795 of synonymous (dS) substitutions (dN/dS or  $\omega$ ) across the species phylogeny. We first obtained  
796 codon-based alignments of the protein sequences used during phylogenomic inference by  
797 threading nucleotides on top of the amino acid sequence using PAL2NAL, version 14 [142], and  
798 calculated  $\omega$  values under the different hypotheses using the CODEML module in PAML, version  
799 4.9 [128]. For each gene tested, we set the null hypothesis ( $H_0$ ) where all internal branches  
800 exhibit the same  $\omega$  (model = 0) and compared it to four different alternative hypotheses. Under  
801 the  $H_{FE-SE \text{ branch}}$  hypothesis, the branches immediately preceding the FEL and SEL were assumed  
802 to exhibit distinct  $\omega$  values from the background (model = 2) (Fig 5Bi). Under the  $H_{FE}$   
803 hypothesis, the branch immediately preceding the FEL was assumed to have a distinct  $\omega$  value,  
804 all FEL crown branches were assumed to have their own collective  $\omega$  value, and all background  
805 branches were assumed to have their own collective  $\omega$  value (model = 2) (Fig 5Ci). The  $H_{SE}$   
806 hypothesis assumed the branch preceding the lineage had its own  $\omega$  value, all SEL crown  
807 branches had their own collective  $\omega$  value, and all background branches were assumed to have  
808 their own collective  $\omega$  value (model = 2) (Fig 5Di). Lastly, the  $H_{FE-SE \text{ crown}}$  hypothesis assumed  
809 that all FEL crown branches had their own collective  $\omega$  value, all SEL crown branches had their

810 own collective  $\omega$  value, and the rest of the branches were assumed to have their own collective  $\omega$   
811 value (model = 2) (Fig 5Ei). To determine if each of the alternative hypotheses was significantly  
812 different from the null hypothesis, we used the likelihood ratio test (LRT) ( $\alpha = 0.01$ ). A few  
813 genes could not be analyzed due to fatal interruptions or errors during use in PAML, version 4.9  
814 [128], which have been reported by other users [143]; these genes were removed from the  
815 analysis. Thus, this analysis was conducted for 989 genes for three tests (H<sub>F<sub>E</sub>-SE</sub> branch, H<sub>F<sub>E</sub></sub>, and  
816 H<sub>SE</sub> hypotheses) and 983 genes for one test (H<sub>F<sub>E</sub>-SE</sub> crown hypothesis).

817

818 *Examination of mutational signatures*      To conservatively identify base substitutions,  
819 insertions, and deletions found in taxa in the FEL or SEL, we examined the status of each  
820 nucleotide at each position in codon-based and amino acid-based OG alignments. We examined  
821 base substitutions, insertions, and deletions at sites that are conserved in the outgroup (i.e., all  
822 outgroup taxa have the same character state for a given position in an alignment). For base  
823 substitutions, we determined if the nucleotide or amino acid residue in a given *Hanseniaspora*  
824 species differed from the conserved outgroup nucleotide or amino acid residue at the same  
825 position. To measure if amino acid substitutions in each lineage were conservative or radical  
826 (i.e., a substitution to a similar amino acid residue versus a substitution to an amino acid residue  
827 with different properties), we used Sneath's index of dissimilarity, which considers 134  
828 categories of biological activity and chemical change to quantify dissimilarity of amino acid  
829 substitutions, and Epstein's coefficient of difference, which considers differences in polarity and  
830 size of amino acids to quantify dissimilarity. Notably, Sneath's index is symmetric (i.e.,  
831 isoleucine to leucine is equivalent to leucine to isoleucine), whereas Epstein's coefficient is not  
832 (i.e., isoleucine to leucine is not equivalent to leucine to isoleucine). For indels, we used a sliding

833 window approach with a step size of one nucleotide. We considered positions where a nucleotide  
834 was present in all outgroup taxa but a gap was present in *Hanseniaspora* as deletions, and  
835 positions where a gap was present in all outgroup taxa and a nucleotide was present in  
836 *Hanseniaspora* species as insertions. Analyses were conducted using custom PYTHON, version  
837 3.5.2 (<https://www.python.org/>), scripts, which use the BIOPYTHON, version 1.70 [144], and  
838 NUMPY, version 1.13.1 [145], modules.

839

840 We discovered that all *Hanseniaspora* species lack the *PHR1* gene, which is associated with the  
841 repair of UV radiation damage. UV exposure induces high levels of CC → TT dinucleotide  
842 substitutions [87]. If *Hanseniaspora* have a reduced capacity to repair UV radiation damage,  
843 they would be expected to contain fewer CC|GG dinucleotides and more TT|AA ones. To test  
844 whether this was the case, we created a CC or GG (hereby denoted as CC|GG) score, which was  
845 calculated using the following formula:

$$846 \text{CC|GG score} = \frac{\text{CC|GG}}{D} \times \frac{1}{\text{G|C}} \quad \text{where } D = \frac{\text{GS}}{2}$$

847 where CC|GG is the number of observed CC or GG dinucleotides in a genome, D is the number  
848 of dinucleotides in the genome, GS is the genome size, and G|C is GC-content. Similarly, we  
849 created a TT|AA score calculated the following formula:

$$850 \text{TT|AA score} = \frac{\text{TT|AA}}{D} \times \frac{1}{\text{A|T}} \quad \text{where } D = \frac{\text{GS}}{2}$$

851 where TT|AA is the number of TT or AA dinucleotides in a genome, D is the number of  
852 dinucleotides in the genome, GS is the genome size, and A|T is AT-content.

853

854 **Data Availability**

855 Data matrices, species-level and single-gene phylogenies, dN/dS results, and HMMs will be  
856 made available through the figshare repository upon publication.

857

858

### 859 **Acknowledgements**

860 We thank members of the Rokas and Hittinger laboratories for helpful suggestions and  
861 discussion.

862

### 863 **Financial Statement**

864 This work was supported in part by the National Science Foundation (<https://www.nsf.gov>)  
865 (DEB-1442113 to AR, DEB-1442148 to CTH and CPK, and DGE-1445197 to NPB) and the  
866 DOE Great Lakes Bioenergy Research Center (<https://www.glbrc.org>) (DOE Office of Science  
867 BER DE-FC02-07ER64494 and DE-SC0018409 to Timothy J. Donohue). CTH is a Pew Scholar  
868 in the Biomedical Sciences and Vilas Faculty Early Career Investigator, supported by the Pew  
869 Charitable Trusts (<https://www.pewtrusts.org>) and Vilas Trust Estate  
870 (<https://www.rsp.wisc.edu/Vilas>), respectively. AR is supported by a Guggenheim fellowship  
871 (<https://www.gf.org/about/fellowship>), JLS by Vanderbilt's Biological Sciences graduate  
872 program (<https://as.vanderbilt.edu/biosci>), and XZ in part by the National Key Project for Basic  
873 Research of China (<http://www.most.gov.cn>) (973 Program, No. 2015CB150600). NC was  
874 supported by funding from the Slovenian Research Agency (<https://www.arrs.gov.si>) (P4-0116).  
875 DL was supported by CONICET (<https://www.conicet.gov.ar>) (PIP 392), FONCyT  
876 (<https://www.argentina.gob.ar/ciencia/agencia/fondo-para-la-investigacion-cientifica-y->  
877 [tecnologica-foncyt](#)) (PICT 2542), and Universidad Nacional del Comahue

878 (<https://www.uncoma.edu.ar>) (B199). This work was conducted in part using the resources of the  
879 Advanced Computing Center for Research and Education at Vanderbilt University  
880 (<https://www.vanderbilt.edu/accre>), the Center for High-Throughput Computing at UW-Madison  
881 (<http://chtc.cs.wisc.edu>), and the UW Biotechnology Center DNA Sequencing Facility  
882 (<https://www.biotech.wisc.edu/services/dnaseq>). Mention of trade names or commercial products  
883 in this publication is solely for the purpose of providing specific information and does not imply  
884 recommendation or endorsement by the U.S. Department of Agriculture  
885 (<https://www.usda.gov/>). USDA is an equal opportunity provider and employer. The funders had  
886 no role in study design, data collection and analysis, decision to publish, or preparation of the  
887 manuscript.



888 **References**

- 889 1. Lindahl T. Quality Control by DNA Repair. *Science* (80- ). 1999;286: 1897–1905.  
890 doi:10.1126/science.286.5446.1897
- 891 2. Hakem R. DNA-damage repair; the good, the bad, and the ugly. *EMBO J.* 2008;27: 589–  
892 605. doi:10.1038/emboj.2008.15
- 893 3. Broustas CG, Lieberman HB. DNA Damage Response Genes and the Development of  
894 Cancer Metastasis. *Radiat Res.* 2014;181: 111–130. doi:10.1667/RR13515.1
- 895 4. Pal C, Maciá MD, Oliver A, Schachar I, Buckling A. Coevolution with viruses drives the  
896 evolution of bacterial mutation rates. *Nature.* 2007;450: 1079–1081.  
897 doi:10.1038/nature06350
- 898 5. Myung K, Datta A, Kolodner RD. Suppression of Spontaneous Chromosomal  
899 Rearrangements by S Phase Checkpoint Functions in *Saccharomyces cerevisiae*. *Cell.*  
900 2001;104: 397–408. doi:10.1016/S0092-8674(01)00227-6
- 901 6. Billmyre RB, Clancey SA, Heitman J. Natural mismatch repair mutations mediate  
902 phenotypic diversity and drug resistance in *Cryptococcus deuterogattii*. *Elife.* 2017;6.  
903 doi:10.7554/eLife.28802
- 904 7. Boyce KJ, Wang Y, Verma S, Shakya VPS, Xue C, Idnurm A. Mismatch Repair of DNA  
905 Replication Errors Contributes to Microevolution in the Pathogenic Fungus *Cryptococcus*  
906 *neoformans*. Alspaugh JA, editor. *MBio.* 2017;8. doi:10.1128/mBio.00595-17
- 907 8. Rhodes J, Beale MA, Vanhove M, Jarvis JN, Kannambath S, Simpson JA, et al. A  
908 Population Genomics Approach to Assessing the Genetic Basis of Within-Host  
909 Microevolution Underlying Recurrent Cryptococcal Meningitis Infection. *G3*  
910 *Genes|Genomes|Genetics.* 2017;7: 1165–1176. doi:10.1534/g3.116.037499

- 911 9. Barnum KJ, O’Connell MJ. Cell Cycle Regulation by Checkpoints. 2014. pp. 29–40.  
912 doi:10.1007/978-1-4939-0888-2\_2
- 913 10. Cross FR, Buchler NE, Skotheim JM. Evolution of networks and sequences in eukaryotic  
914 cell cycle control. *Philos Trans R Soc Lond B Biol Sci.* 2011;366: 3532–44.  
915 doi:10.1098/rstb.2011.0078
- 916 11. Medina EM, Turner JJ, Gordân R, Skotheim JM, Buchler NE. Punctuated evolution and  
917 transitional hybrid network in an ancestral cell cycle of fungi. *Elife.* 2016;5.  
918 doi:10.7554/eLife.09492
- 919 12. Costanzo M, Nishikawa JL, Tang X, Millman JS, Schub O, Breitzkreuz K, et al. CDK  
920 Activity Antagonizes Whi5, an Inhibitor of G1/S Transcription in Yeast. *Cell.* 2004;117:  
921 899–913. doi:10.1016/j.cell.2004.05.024
- 922 13. Castro A, Bernis C, Vigneron S, Labbé J-C, Lorca T. The anaphase-promoting complex: a  
923 key factor in the regulation of cell cycle. *Oncogene.* 2005;24: 314–325.  
924 doi:10.1038/sj.onc.1207973
- 925 14. Heinrich S, Sewart K, Windecker H, Langegger M, Schmidt N, Hustedt N, et al. Mad1  
926 contribution to spindle assembly checkpoint signalling goes beyond presenting Mad2 at  
927 kinetochores. *EMBO Rep.* 2014;15: 291–298. doi:10.1002/embr.201338114
- 928 15. Hendler A, Medina EM, Kishkevich A, Abu-Qarn M, Klier S, Buchler NE, et al. Gene  
929 duplication and co-evolution of G1/S transcription factor specificity in fungi are essential  
930 for optimizing cell fitness. Snyder M, editor. *PLOS Genet.* 2017;13: e1006778.  
931 doi:10.1371/journal.pgen.1006778
- 932 16. Zhou B-BS, Elledge SJ. The DNA damage response: putting checkpoints in perspective.  
933 *Nature.* 2000;408: 433–439. doi:10.1038/35044005

- 934 17. Weinert TA, Kiser GL, Hartwell LH. Mitotic checkpoint genes in budding yeast and the  
935 dependence of mitosis on DNA replication and repair. *Genes Dev.* 1994;8: 652–665.  
936 doi:10.1101/gad.8.6.652
- 937 18. Serero A, Jubin C, Loeillet S, Legoix-Né P, Nicolas AG. Mutational landscape of yeast  
938 mutator strains. *Proc Natl Acad Sci.* 2014;111: 1897–1902. doi:10.1073/pnas.1314423111
- 939 19. Campbell BB, Light N, Fabrizio D, Zatzman M, Fuligni F, de Borja R, et al.  
940 Comprehensive Analysis of Hypermutation in Human Cancer. *Cell.* 2017;171: 1042–  
941 1056.e10. doi:10.1016/j.cell.2017.09.048
- 942 20. Huang M-E, de Calignon A, Nicolas A, Galibert F. POL32 , a subunit of the  
943 *Saccharomyces cerevisiae* DNA polymerase  $\delta$ , defines a link between DNA replication  
944 and the mutagenic bypass repair pathway. *Curr Genet.* 2000;38: 178–187.  
945 doi:10.1007/s002940000149
- 946 21. Xiao W, Chow BL, Hanna M, Doetsch PW. Deletion of the MAG1 DNA glycosylase  
947 gene suppresses alkylation-induced killing and mutagenesis in yeast cells lacking AP  
948 endonucleases. *Mutat Res - DNA Repair.* 2001; doi:10.1016/S0921-8777(01)00113-6
- 949 22. Sebastian J, Sancar GB. A damage-responsive DNA binding protein regulates  
950 transcription of the yeast DNA repair gene PHR1. *Proc Natl Acad Sci.* 1991;88: 11251–  
951 11255. doi:10.1073/pnas.88.24.11251
- 952 23. Sebastian J, Kraus B, Sancar GB. Expression of the yeast PHR1 gene is induced by DNA-  
953 damaging agents. *Mol Cell Biol.* 1990;10: 4630–7.
- 954 24. Nunoshiba T. A novel Nudix hydrolase for oxidized purine nucleoside triphosphates  
955 encoded by ORFYLR151c (PCD1 gene) in *Saccharomyces cerevisiae*. *Nucleic Acids Res.*  
956 2004;32: 5339–5348. doi:10.1093/nar/gkh868

- 957 25. Cartwright JL, Gasmi L, Spiller DG, McLennan AG. The *Saccharomyces cerevisiae*  
958 PCD1 gene encodes a peroxisomal nudix hydrolase active toward coenzyme A and its  
959 derivatives. *J Biol Chem.* 2000; doi:10.1074/jbc.M005015200
- 960 26. De Bont R. Endogenous DNA damage in humans: a review of quantitative data.  
961 *Mutagenesis.* 2004;19: 169–185. doi:10.1093/mutage/geh025
- 962 27. Ram Y, Hadany L. The evolution of stress-induced hypermutation in asexual populations.  
963 *Evolution (N Y).* 2012;66: 2315–2328. doi:10.1111/j.1558-5646.2012.01576.x
- 964 28. Oliver A. High Frequency of Hypermutable *Pseudomonas aeruginosa* in Cystic Fibrosis  
965 Lung Infection. *Science (80- ).* 2000;288: 1251–1253. doi:10.1126/science.288.5469.1251
- 966 29. Giraud A, Matic I, Tenailon O, Clara A, Radman M, Fons M, et al. Costs and Benefits of  
967 High Mutation Rates: Adaptive Evolution of Bacteria in the Mouse Gut. *Science (80- ).*  
968 2001;291: 2606–2608. doi:10.1126/science.1056421
- 969 30. Taddei F, Radman M, Maynard-Smith J, Toupance B, Gouyon PH, Godelle B. Role of  
970 mutator alleles in adaptive evolution. *Nature.* 1997;387: 700–702. doi:10.1038/42696
- 971 31. Sniegowski PD, Gerrish PJ, Lenski RE. Evolution of high mutation rates in experimental  
972 populations of *E. coli*. *Nature.* 1997;387: 703–705. doi:10.1038/42701
- 973 32. McDonald MJ, Hsieh Y-Y, Yu Y-H, Chang S-L, Leu J-Y. The Evolution of Low  
974 Mutation Rates in Experimental Mutator Populations of *Saccharomyces cerevisiae*. *Curr*  
975 *Biol.* 2012;22: 1235–1240. doi:10.1016/j.cub.2012.04.056
- 976 33. Riley R, Haridas S, Wolfe KH, Lopes MR, Hittinger CT, Göker M, et al. Comparative  
977 genomics of biotechnologically important yeasts. *Proc Natl Acad Sci.* 2016;113: 9882–  
978 9887. doi:10.1073/pnas.1603941113
- 979 34. Shen X-X, Opulente DA, Kominek J, Zhou X, Steenwyk JL, Buh K V., et al. Tempo and

- 980 Mode of Genome Evolution in the Budding Yeast Subphylum. *Cell*. 2018;  
981 doi:10.1016/j.cell.2018.10.023
- 982 35. Shen X-X, Zhou X, Kominek J, Kurtzman CP, Hittinger CT, Rokas A. Reconstructing the  
983 Backbone of the Saccharomycotina Yeast Phylogeny Using Genome-Scale Data. *G3*  
984 *Genes|Genomes|Genetics*. Genetics Society of America; 2016;6: 3927–3939.  
985 doi:10.1534/g3.116.034744
- 986 36. Albertin W, Setati ME, Miot-Sertier C, Mostert TT, Colonna-Ceccaldi B, Coulon J, et al.  
987 *Hanseniaspora uvarum* from Winemaking Environments Show Spatial and Temporal  
988 Genetic Clustering. *Front Microbiol*. 2016;6. doi:10.3389/fmicb.2015.01569
- 989 37. Jordão A, Vilela A, Cosme F. From Sugar of Grape to Alcohol of Wine: Sensorial Impact  
990 of Alcohol in Wine. *Beverages*. 2015;1: 292–310. doi:10.3390/beverages1040292
- 991 38. Montero CM, Doderio MCR, Sanchez DAG, Barroso CG. Analysis of low molecular  
992 weight carbohydrates in food and beverages: A review. *Chromatographia*. 2004;  
993 doi:10.1365/s10337-003-0134-3
- 994 39. Martin V, Valera M, Medina K, Boido E, Carrau F. Oenological Impact of the  
995 *Hanseniaspora/Kloeckera* Yeast Genus on Wines—A Review. *Fermentation*. 2018;4: 76.  
996 doi:10.3390/fermentation4030076
- 997 40. Langenberg A-K, Bink FJ, Wolff L, Walter S, von Wallbrunn C, Grossmann M, et al.  
998 Glycolytic Functions Are Conserved in the Genome of the Wine Yeast *Hanseniaspora*  
999 *uvarum*, and Pyruvate Kinase Limits Its Capacity for Alcoholic Fermentation. Dudley EG,  
1000 editor. *Appl Environ Microbiol*. 2017;83. doi:10.1128/AEM.01580-17
- 1001 41. Čadež N, Bellora N, Ulloa R, Hittinger CT, Libkind D. Genomic content of a novel yeast  
1002 species *Hanseniaspora gamundiae* sp. nov. from fungal stromata (*Cyttaria*) associated with

- 1003 a unique fermented beverage in Andean Patagonia, Argentina. Yurkov AM, editor. PLoS  
1004 One. 2019;14: e0210792. doi:10.1371/journal.pone.0210792
- 1005 42. Zhou X, Shen X-X, Hittinger CT, Rokas A. Evaluating Fast Maximum Likelihood-Based  
1006 Phylogenetic Programs Using Empirical Phylogenomic Data Sets. Mol Biol Evol.  
1007 2018;35: 486–503. doi:10.1093/molbev/msx302
- 1008 43. Waterhouse RM, Tegenfeldt F, Li J, Zdobnov EM, Kriventseva E V. OrthoDB: a  
1009 hierarchical catalog of animal, fungal and bacterial orthologs. Nucleic Acids Res.  
1010 2013;41: D358–D365. doi:10.1093/nar/gks1116
- 1011 44. Opulente DA, Rollinson EJ, Bernick-Roehr C, Hulfachor AB, Rokas A, Kurtzman CP, et  
1012 al. Factors driving metabolic diversity in the budding yeast subphylum. BMC Biol.  
1013 2018;16: 26. doi:10.1186/s12915-018-0498-3
- 1014 45. Kurtzman CP, Fell JW. The Yeasts - A Taxonomic Study. 4th ed. Kurtzman CP, Fell JW,  
1015 editors. Elsevier Science; 1998.
- 1016 46. Charron MJ, Read E, Haut SR, Michels CA. Molecular evolution of the telomere-  
1017 associated MAL loci of *Saccharomyces*. Genetics. 1989;122: 307–16.
- 1018 47. Koschwanez JH, Foster KR, Murray AW. Sucrose Utilization in Budding Yeast as a  
1019 Model for the Origin of Undifferentiated Multicellularity. Keller L, editor. PLoS Biol.  
1020 2011;9: e1001122. doi:10.1371/journal.pbio.1001122
- 1021 48. Jorgensen P. Systematic Identification of Pathways That Couple Cell Growth and Division  
1022 in Yeast. Science (80- ). 2002;297: 395–400. doi:10.1126/science.1070850
- 1023 49. Colman-Lerner A, Chin TE, Brent R. Yeast Cbk1 and Mob2 Activate Daughter-Specific  
1024 Genetic Programs to Induce Asymmetric Cell Fates. Cell. 2001;107: 739–750.  
1025 doi:10.1016/S0092-8674(01)00596-7

- 1026 50. Lubelsky Y, Reuven N, Shaul Y. Autorepression of Rfx1 Gene Expression: Functional  
1027 Conservation from Yeast to Humans in Response to DNA Replication Arrest. *Mol Cell*  
1028 *Biol.* 2005;25: 10665–10673. doi:10.1128/MCB.25.23.10665-10673.2005
- 1029 51. Galgoczy DJ, Toczyski DP. Checkpoint Adaptation Precedes Spontaneous and Damage-  
1030 Induced Genomic Instability in Yeast. *Mol Cell Biol.* 2001;21: 1710–1718.  
1031 doi:10.1128/MCB.21.5.1710-1718.2001
- 1032 52. Kim IY, Kwon HY, Park KH, Kim DS. Anaphase-Promoting Complex 7 is a Prognostic  
1033 Factor in Human Colorectal Cancer. *Ann Coloproctol.* 2017;33: 139–145.  
1034 doi:10.3393/ac.2017.33.4.139
- 1035 53. Xiao W, Chow BL. Synergism between yeast nucleotide and base excision repair  
1036 pathways in the protection against DNA methylation damage. *Curr Genet.* 1998;  
1037 doi:10.1007/s002940050313
- 1038 54. Nitiss KC, Malik M, He X, White SW, Nitiss JL. Tyrosyl-DNA phosphodiesterase (Tdp1)  
1039 participates in the repair of Top2-mediated DNA damage. *Proc Natl Acad Sci.* 2006;103:  
1040 8953–8958. doi:10.1073/pnas.0603455103
- 1041 55. Lustig AJ. Cdc13 subcomplexes regulate multiple telomere functions. *Nat Struct Biol.*  
1042 2001;8: 297–9. doi:10.1038/86157
- 1043 56. Zhu YO, Siegal ML, Hall DW, Petrov DA. Precise estimates of mutation rate and  
1044 spectrum in yeast. *Proc Natl Acad Sci.* 2014;111: E2310–E2318.  
1045 doi:10.1073/pnas.1323011111
- 1046 57. Marth GT, Yu F, Indap AR, Garimella K, Gravel S, Leong W, et al. The functional  
1047 spectrum of low-frequency coding variation. *Genome Biol.* 2011;12: R84.  
1048 doi:10.1186/gb-2011-12-9-r84

- 1049 58. Wang J, Raskin L, Samuels DC, Shyr Y, Guo Y. Genome measures used for quality  
1050 control are dependent on gene function and ancestry. *Bioinformatics*. 2015;31: 318–23.  
1051 doi:10.1093/bioinformatics/btu668
- 1052 59. Vignal A, Milan D, SanCristobal M, Eggen A. A review on SNP and other types of  
1053 molecular markers and their use in animal genetics. *Genet Sel Evol*. 2002;34: 275–305.  
1054 doi:10.1051/gse:2002009
- 1055 60. Sneath PH. Relations between chemical structure and biological activity in peptides. *J*  
1056 *Theor Biol*. 1966;12: 157–95.
- 1057 61. Epstein CJ. Non-randomness of Amino-acid Changes in the Evolution of Homologous  
1058 Proteins. *Nature*. 1967;215: 355–359. doi:10.1038/215355a0
- 1059 62. Albalat R, Cañestro C. Evolution by gene loss. *Nat Rev Genet*. 2016;17: 379–391.  
1060 doi:10.1038/nrg.2016.39
- 1061 63. Baba T, Ara T, Hasegawa M, Takai Y, Okumura Y, Baba M, et al. Construction of  
1062 *Escherichia coli* K-12 in-frame, single-gene knockout mutants: the Keio collection. *Mol*  
1063 *Syst Biol*. 2006;2. doi:10.1038/msb4100050
- 1064 64. Giaever G, Chu AM, Ni L, Connelly C, Riles L, Véronneau S, et al. Functional profiling  
1065 of the *Saccharomyces cerevisiae* genome. *Nature*. 2002;418: 387–391.  
1066 doi:10.1038/nature00935
- 1067 65. Segal ES, Gritsenko V, Levitan A, Yadav B, Dror N, Steenwyk JL, et al. Gene  
1068 Essentiality Analyzed by In Vivo Transposon Mutagenesis and Machine Learning in a  
1069 Stable Haploid Isolate of *Candida albicans*. Di Pietro A, editor. *MBio*. 2018;9.  
1070 doi:10.1128/mBio.02048-18
- 1071 66. Koskiniemi S, Sun S, Berg OG, Andersson DI. Selection-Driven Gene Loss in Bacteria.



- 1072 Casadesús J, editor. PLoS Genet. 2012;8: e1002787. doi:10.1371/journal.pgen.1002787
- 1073 67. Keeling PJ, Slamovits CH. Simplicity and complexity of microsporidian genomes.  
1074 Eukaryot Cell. 2004;3: 1363–9. doi:10.1128/EC.3.6.1363-1369.2004
- 1075 68. Katinka MD, Duprat S, Cornillot E, Méténier G, Thomarat F, Prensier G, et al. Genome  
1076 sequence and gene compaction of the eukaryote parasite *Encephalitozoon cuniculi*.  
1077 Nature. 2001;414: 450–453. doi:10.1038/35106579
- 1078 69. Chang ES, Neuhof M, Rubinstein ND, Diamant A, Philippe H, Huchon D, et al. Genomic  
1079 insights into the evolutionary origin of Myxozoa within Cnidaria. Proc Natl Acad Sci U S  
1080 A. 2015;112: 14912–7. doi:10.1073/pnas.1511468112
- 1081 70. Hittinger CT, Rokas A, Carroll SB. Parallel inactivation of multiple GAL pathway genes  
1082 and ecological diversification in yeasts. Proc Natl Acad Sci. 2004;101: 14144–14149.  
1083 doi:10.1073/pnas.0404319101
- 1084 71. Slot JC, Rokas A. Multiple GAL pathway gene clusters evolved independently and by  
1085 different mechanisms in fungi. Proc Natl Acad Sci. 2010;107: 10136–10141.  
1086 doi:10.1073/pnas.0914418107
- 1087 72. Wolfe KH, Armisen D, Proux-Wera E, ÓhÉigeartaigh SS, Azam H, Gordon JL, et al.  
1088 Clade- and species-specific features of genome evolution in the Saccharomycetaceae.  
1089 Nielsen J, editor. FEMS Yeast Res. 2015;15: fov035. doi:10.1093/femsyr/fov035
- 1090 73. Hartwell L. Defects in a cell cycle checkpoint may be responsible for the genomic  
1091 instability of cancer cells. Cell. 1992. doi:10.1016/0092-8674(92)90586-2
- 1092 74. Tavares MJ, Güldener U, Esteves M, Mendes-Faia A, Mendes-Ferreira A, Mira NP.  
1093 Genome Sequence of the Wine Yeast *Saccharomyces ludwigii* UTAD17. Cuomo CA,  
1094 editor. Microbiol Resour Announc. 2018;7. doi:10.1128/MRA.01195-18

- 1095 75. Sterling CH. DNA Polymerase 4 of *Saccharomyces cerevisiae* Is Important for Accurate  
1096 Repair of Methyl-Methanesulfonate-Induced DNA Damage. *Genetics*. 2005;172: 89–98.  
1097 doi:10.1534/genetics.105.049254
- 1098 76. Jenni S, Harrison SC. Structure of the DASH/Dam1 complex shows its role at the yeast  
1099 kinetochore-microtubule interface. *Science* (80- ). 2018;360: 552–558.  
1100 doi:10.1126/science.aar6436
- 1101 77. Dimitrova YN, Jenni S, Valverde R, Khin Y, Harrison SC. Structure of the MIND  
1102 Complex Defines a Regulatory Focus for Yeast Kinetochore Assembly. *Cell*. 2016;167:  
1103 1014–1027.e12. doi:10.1016/j.cell.2016.10.011
- 1104 78. Seixas I, Barbosa C, Salazar SB, Mendes-Faia A, Wang Y, Güldener U, et al. Genome  
1105 Sequence of the Nonconventional Wine Yeast *Hanseniaspora guilliermondii* UTAD222.  
1106 *Genome Announc. American Society for Microbiology*; 2017;5: e01515-16.  
1107 doi:10.1128/genomeA.01515-16
- 1108 79. Chavan P, Mane S, Kulkarni G, Shaikh S, Ghormade V, Nerkar DP, et al. Natural yeast  
1109 flora of different varieties of grapes used for wine making in India. *Food Microbiol.*  
1110 2009;26: 801–808. doi:10.1016/j.fm.2009.05.005
- 1111 80. Wikstrom N, Savolainen V, Chase MW. Evolution of the angiosperms: calibrating the  
1112 family tree. *Proc R Soc B Biol Sci*. 2001;268: 2211–2220. doi:10.1098/rspb.2001.1782
- 1113 81. Lynch M, Sung W, Morris K, Coffey N, Landry CR, Dopman EB, et al. A genome-wide  
1114 view of the spectrum of spontaneous mutations in yeast. *Proc Natl Acad Sci*. 2008;  
1115 doi:10.1073/pnas.0803466105
- 1116 82. Lynch M. The Origins of Genome Architecture. *Journal of Heredity*. 2007.  
1117 doi:10.1093/jhered/esm073

- 1118 83. Keightley PD, Trivedi U, Thomson M, Oliver F, Kumar S, Blaxter ML. Analysis of the  
1119 genome sequences of three *Drosophila melanogaster* spontaneous mutation accumulation  
1120 lines. *Genome Res.* 2009;19: 1195–1201. doi:10.1101/gr.091231.109
- 1121 84. Lynch M. Rate, molecular spectrum, and consequences of human mutation. *Proc Natl*  
1122 *Acad Sci.* 2010;107: 961–968. doi:10.1073/pnas.0912629107
- 1123 85. Hershberg R, Petrov DA. Evidence That Mutation Is Universally Biased towards AT in  
1124 Bacteria. Nachman MW, editor. *PLoS Genet.* 2010;6: e1001115.  
1125 doi:10.1371/journal.pgen.1001115
- 1126 86. Seeberg E, Eide L, Bjørås M. The base excision repair pathway. *Trends Biochem Sci.*  
1127 1995;20: 391–397. doi:10.1016/S0968-0004(00)89086-6
- 1128 87. Huang MN, Yu W, Teoh WW, Ardin M, Jusakul A, Ng AWT, et al. Genome-scale  
1129 mutational signatures of aflatoxin in cells, mice, and human tumors. *Genome Res.*  
1130 2017;27: 1475–1486. doi:10.1101/gr.220038.116
- 1131 88. Hittinger CT, Gonçalves P, Sampaio JP, Dover J, Johnston M, Rokas A. Remarkably  
1132 ancient balanced polymorphisms in a multi-locus gene network. *Nature.* 2010;464: 54–58.  
1133 doi:10.1038/nature08791
- 1134 89. Zhou X, Peris D, Kominek J, Kurtzman CP, Hittinger CT, Rokas A. in silico Whole  
1135 Genome Sequencer & Analyzer (iWGS): A Computational Pipeline to Guide the  
1136 Design and Analysis of de novo Genome Sequencing Studies. *G3*  
1137 *Genes|Genomes|Genetics.* 2016; doi:10.1534/g3.116.034249
- 1138 90. Yandell M, Ence D. A beginner’s guide to eukaryotic genome annotation. *Nat Rev Genet.*  
1139 2012;13: 329–42. doi:10.1038/nrg3174
- 1140 91. Bolger AM, Lohse M, Usadel B. Trimmomatic: A flexible trimmer for Illumina sequence

- 1141 data. *Bioinformatics*. 2014;30: 2114–2120. doi:10.1093/bioinformatics/btu170
- 1142 92. Song L, Florea L, Langmead B. Lighter: fast and memory-efficient sequencing error  
1143 correction without counting. *Genome Biol*. 2014;15: 509. doi:10.1186/s13059-014-0509-9
- 1144 93. Chikhi R, Medvedev P. Informed and automated k-mer size selection for genome  
1145 assembly. *Bioinformatics*. 2014;30: 31–37. doi:10.1093/bioinformatics/btt310
- 1146 94. Simpson JT, Wong K, Jackman SD, Schein JE, Jones SJM, Birol I. ABySS: A parallel  
1147 assembler for short read sequence data. *Genome Res*. 2009;19: 1117–1123.  
1148 doi:10.1101/gr.089532.108
- 1149 95. Weisenfeld NI, Yin S, Sharpe T, Lau B, Hegarty R, Holmes L, et al. Comprehensive  
1150 variation discovery in single human genomes. *Nat Genet*. 2014;46: 1350–1355.  
1151 doi:10.1038/ng.3121
- 1152 96. Zimin A V., Marçais G, Puiu D, Roberts M, Salzberg SL, Yorke JA. The MaSuRCA  
1153 genome assembler. *Bioinformatics*. 2013;29: 2669–2677.  
1154 doi:10.1093/bioinformatics/btt476
- 1155 97. Simpson JT, Durbin R. Efficient de novo assembly of large genomes using compressed  
1156 data structures. *Genome Res*. 2012;22: 549–556. doi:10.1101/gr.126953.111
- 1157 98. Luo R, Liu B, Xie Y, Li Z, Huang W, Yuan J, et al. SOAPdenovo2: an empirically  
1158 improved memory-efficient short-read de novo assembler. *Gigascience*. 2012;1: 18.  
1159 doi:10.1186/2047-217X-1-18
- 1160 99. Bankevich A, Nurk S, Antipov D, Gurevich AA, Dvorkin M, Kulikov AS, et al. SPAdes:  
1161 A New Genome Assembly Algorithm and Its Applications to Single-Cell Sequencing. *J*  
1162 *Comput Biol*. 2012;19: 455–477. doi:10.1089/cmb.2012.0021
- 1163 100. Gurevich A, Saveliev V, Vyahhi N, Tesler G. QUASt: quality assessment tool for

- 1164 genome assemblies. *Bioinformatics*. 2013;29: 1072–1075.
- 1165 doi:10.1093/bioinformatics/btt086
- 1166 101. Holt C, Yandell M. MAKER2: an annotation pipeline and genome-database management  
1167 tool for second-generation genome projects. *BMC Bioinformatics*. 2011;12: 491.  
1168 doi:10.1186/1471-2105-12-491
- 1169 102. Grigoriev I V., Nikitin R, Haridas S, Kuo A, Ohm R, Otilar R, et al. MycoCosm portal:  
1170 gearing up for 1000 fungal genomes. *Nucleic Acids Res*. 2014;42: D699–D704.  
1171 doi:10.1093/nar/gkt1183
- 1172 103. Ter-Hovhannisyan V, Lomsadze A, Chernoff YO, Borodovsky M. Gene prediction in  
1173 novel fungal genomes using an ab initio algorithm with unsupervised training. *Genome*  
1174 *Res*. 2008;18: 1979–1990. doi:10.1101/gr.081612.108
- 1175 104. Korf I. Gene finding in novel genomes. *BMC Bioinformatics*. 2004;5: 59.  
1176 doi:10.1186/1471-2105-5-59
- 1177 105. Stanke M, Waack S. Gene prediction with a hidden Markov model and a new intron  
1178 submodel. *Bioinformatics*. 2003;19: ii215–ii225. doi:10.1093/bioinformatics/btg1080
- 1179 106. Sternes PR, Lee D, Kutyna DR, Borneman AR. Genome Sequences of Three Species of  
1180 *Hanseniaspora* Isolated from Spontaneous Wine Fermentations. *Genome Announc*.  
1181 2016;4: e01287-16. doi:10.1128/genomeA.01287-16
- 1182 107. Giorello FM, Berná L, Greif G, Camesasca L, Salzman V, Medina K, et al. Genome  
1183 Sequence of the Native Apiculate Wine Yeast *Hanseniaspora vineae* T02/19AF. *Genome*  
1184 *Announc*. 2014;2: e00530-14. doi:10.1128/genomeA.00530-14
- 1185 108. Cadez N. Phylogenetic placement of *Hanseniaspora*-*Kloeckera* species using multigene  
1186 sequence analysis with taxonomic implications: descriptions of *Hanseniaspora*

- 1187 pseudoguilliermondii sp. nov. and Hanseniaspora occidentalis var. citrica var. nov. Int J  
1188 Syst Evol Microbiol. 2006;56: 1157–1165. doi:10.1099/ijs.0.64052-0
- 1189 109. Chang C-F, Huang L-Y, Chen S-F, Lee C-F. Kloeckera taiwanica sp. nov., an  
1190 ascomycetous apiculate yeast species isolated from mushroom fruiting bodies. Int J Syst  
1191 Evol Microbiol. 2012;62: 1434–1437. doi:10.1099/ijs.0.034231-0
- 1192 110. Waterhouse RM, Seppey M, Simão FA, Manni M, Ioannidis P, Klioutchnikov G, et al.  
1193 BUSCO Applications from Quality Assessments to Gene Prediction and Phylogenomics.  
1194 Mol Biol Evol. 2018;35: 543–548. doi:10.1093/molbev/msx319
- 1195 111. Li L, Stoeckert CJ, Roos DS. OrthoMCL: Identification of ortholog groups for eukaryotic  
1196 genomes. Genome Res. 2003;13: 2178–2189. doi:10.1101/gr.1224503
- 1197 112. van Dongen S. Graph clustering by flow simulation. Graph Stimul by flow Clust.  
1198 2000;PhD thesis: University of Utrecht. doi:10.1016/j.cosrev.2007.05.001
- 1199 113. Madden T. The BLAST sequence analysis tool. BLAST Seq Anal Tool. 2013; 1–17.
- 1200 114. Kocot KM, Citarella MR, Moroz LL, Halanych KM. PhyloTreePruner: A phylogenetic  
1201 tree-based approach for selection of orthologous sequences for phylogenomics. Evol  
1202 Bioinforma. 2013;2013: 429–435. doi:10.4137/EBO.S12813
- 1203 115. Katoh K, Standley DM. MAFFT Multiple Sequence Alignment Software Version 7:  
1204 Improvements in Performance and Usability. Mol Biol Evol. 2013;30: 772–780.  
1205 doi:10.1093/molbev/mst010
- 1206 116. Mount DW. Using BLOSUM in Sequence Alignments. Cold Spring Harb Protoc.  
1207 2008;2008: pdb.top39-pdb.top39. doi:10.1101/pdb.top39
- 1208 117. Capella-Gutierrez S, Silla-Martinez JM, Gabaldon T. trimAl: a tool for automated  
1209 alignment trimming in large-scale phylogenetic analyses. Bioinformatics. 2009;25: 1972–

- 1210 1973. doi:10.1093/bioinformatics/btp348
- 1211 118. Price MN, Dehal PS, Arkin AP. FastTree 2 - Approximately maximum-likelihood trees  
1212 for large alignments. PLoS One. 2010;5. doi:10.1371/journal.pone.0009490
- 1213 119. Felsenstein J. Evolutionary trees from DNA sequences: A maximum likelihood approach.  
1214 J Mol Evol. 1981;17: 368–376. doi:10.1007/BF01734359
- 1215 120. Philippe H, Delsuc F, Brinkmann H, Lartillot N. Phylogenomics. Annu Rev Ecol Evol  
1216 Syst. 2005;36: 541–562. doi:10.1146/annurev.ecolsys.35.112202.130205
- 1217 121. Rokas A, Williams BL, King N, Carroll SB. Genome-scale approaches to resolving  
1218 incongruence in molecular phylogenies. Nature. 2003;425: 798–804.  
1219 doi:10.1038/nature02053
- 1220 122. Edwards SV. Is a new and general theory of molecular systematics emerging? Evolution  
1221 (N Y). 2009;63: 1–19. doi:10.1111/j.1558-5646.2008.00549.x
- 1222 123. Stamatakis A. RAxML version 8: a tool for phylogenetic analysis and post-analysis of  
1223 large phylogenies. Bioinformatics. 2014;30: 1312–1313.  
1224 doi:10.1093/bioinformatics/btu033
- 1225 124. Le SQ, Gascuel O. An Improved General Amino Acid Replacement Matrix. Mol Biol  
1226 Evol. 2008;25: 1307–1320. doi:10.1093/molbev/msn067
- 1227 125. Mirarab S, Warnow T. ASTRAL-II: coalescent-based species tree estimation with many  
1228 hundreds of taxa and thousands of genes. Bioinformatics. 2015;31: i44–i52.  
1229 doi:10.1093/bioinformatics/btv234
- 1230 126. Stamatakis A, Hoover P, Rougemont J. A Rapid Bootstrap Algorithm for the RAxML  
1231 Web Servers. Renner S, editor. Syst Biol. 2008;57: 758–771.  
1232 doi:10.1080/10635150802429642

- 1233 127. Junier T, Zdobnov EM. The Newick utilities: high-throughput phylogenetic tree  
1234 processing in the UNIX shell. *Bioinformatics*. 2010;26: 1669–1670.  
1235 doi:10.1093/bioinformatics/btq243
- 1236 128. Yang Z. PAML 4: Phylogenetic Analysis by Maximum Likelihood. *Mol Biol Evol*.  
1237 2007;24: 1586–1591. doi:10.1093/molbev/msm088
- 1238 129. dos Reis M, Donoghue PCJ, Yang Z. Bayesian molecular clock dating of species  
1239 divergences in the genomics era. *Nat Rev Genet*. 2016;17: 71–80. doi:10.1038/nrg.2015.8
- 1240 130. Reis M d., Yang Z. Approximate Likelihood Calculation on a Phylogeny for Bayesian  
1241 Estimation of Divergence Times. *Mol Biol Evol*. 2011;28: 2161–2172.  
1242 doi:10.1093/molbev/msr045
- 1243 131. Cherry JM, Hong EL, Amundsen C, Balakrishnan R, Binkley G, Chan ET, et al.  
1244 *Saccharomyces* Genome Database: the genomics resource of budding yeast. *Nucleic*  
1245 *Acids Res*. 2012;40: D700–D705. doi:10.1093/nar/gkr1029
- 1246 132. Pearson WR. An Introduction to Sequence Similarity (“Homology”) Searching. *Curr*  
1247 *Protoc Bioinforma*. 2013;42: 3.1.1–3.1.8. doi:10.1002/0471250953.bi0301s42
- 1248 133. Eddy SR. Accelerated Profile HMM Searches. Pearson WR, editor. *PLoS Comput Biol*.  
1249 2011;7: e1002195. doi:10.1371/journal.pcbi.1002195
- 1250 134. GeneOntologyConsortium. The Gene Ontology (GO) database and informatics resource.  
1251 *Nucleic Acids Res*. 2004;32: 258D–261. doi:10.1093/nar/gkh036
- 1252 135. Klopfenstein D V., Zhang L, Pedersen BS, Ramírez F, Warwick Vesztröcy A, Naldi A, et  
1253 al. GOATOOLS: A Python library for Gene Ontology analyses. *Sci Rep*. 2018;8: 10872.  
1254 doi:10.1038/s41598-018-28948-z
- 1255 136. Holm S. A simple sequentially rejective multiple test procedure. *Scand J Stat*. 1979;6: 65–



- 1256 70.
- 1257 137. Kanehisa M, Sato Y, Kawashima M, Furumichi M, Tanabe M. KEGG as a reference  
1258 resource for gene and protein annotation. *Nucleic Acids Res.* 2016;44: D457–D462.  
1259 doi:10.1093/nar/gkv1070
- 1260 138. Winzeler EA, Shoemaker DD, Astromoff A, Liang H, Anderson K, Andre B, et al.  
1261 Functional characterization of the *S-cerevisiae* genome by gene deletion and parallel  
1262 analysis. *Science* (80- ). 1999;285: 901–906. doi:10.1126/science.285.5429.901
- 1263 139. Langmead B, Salzberg SL. Fast gapped-read alignment with Bowtie 2. *Nat Methods.*  
1264 2012;9: 357–359. doi:10.1038/nmeth.1923
- 1265 140. Li H, Handsaker B, Wysoker A, Fennell T, Ruan J, Homer N, et al. The Sequence  
1266 Alignment/Map format and SAMtools. *Bioinformatics.* 2009;25: 2078–2079.  
1267 doi:10.1093/bioinformatics/btp352
- 1268 141. Weiß CL, Pais M, Cano LM, Kamoun S, Burbano HA. nQuire: a statistical framework for  
1269 ploidy estimation using next generation sequencing. *BMC Bioinformatics.* 2018;19: 122.  
1270 doi:10.1186/s12859-018-2128-z
- 1271 142. Suyama M, Torrents D, Bork P. PAL2NAL: Robust conversion of protein sequence  
1272 alignments into the corresponding codon alignments. *Nucleic Acids Res.* 2006;34.  
1273 doi:10.1093/nar/gkl315
- 1274 143. Liu L, Zhang J, Rheindt FE, Lei F, Qu Y, Wang Y, et al. Genomic evidence reveals a  
1275 radiation of placental mammals uninterrupted by the KPg boundary. *Proc Natl Acad Sci.*  
1276 2017;114: E7282–E7290. doi:10.1073/pnas.1616744114
- 1277 144. Cock PJA, Antao T, Chang JT, Chapman BA, Cox CJ, Dalke A, et al. Biopython: freely  
1278 available Python tools for computational molecular biology and bioinformatics.

- 1279            Bioinformatics. 2009;25: 1422–1423. doi:10.1093/bioinformatics/btp163
- 1280    145.    Van Der Walt S, Colbert SC, Varoquaux G. The NumPy array: A structure for efficient
- 1281            numerical computation. Comput Sci Eng. 2011;13: 22–30. doi:10.1109/MCSE.2011.37
- 1282
- 1283

1284 **Tables**

1285 **Table 1.** Rate of sequence evolution hypotheses and results.

| Hypotheses for inter-lineage comparisons                                                           | Parameters                                                                                                                                   | Fraction of genes significantly different than $H_0$ | Median $\omega$ values       |            |            |
|----------------------------------------------------------------------------------------------------|----------------------------------------------------------------------------------------------------------------------------------------------|------------------------------------------------------|------------------------------|------------|------------|
|                                                                                                    |                                                                                                                                              |                                                      | $\omega_{\text{background}}$ | $\omega_1$ | $\omega_2$ |
| <b><math>H_0</math>: Uniform rate for all branches</b><br>Figure S9A                               | Single $\omega$ value                                                                                                                        | N/A                                                  | N/A                          | N/A        | N/A        |
| <b><math>H_{\text{FE-SE branch}}</math>: Unique rates for FEL and SEL stem</b><br>Figure S9B       | $\omega_{\text{background}} \neq \omega_1 \neq \omega_2$<br>$\omega_1 = \text{FEL stem branch}$<br>$\omega_2 = \text{SEL stem branch}$       | 678 genes<br>(68.55% of examined genes)              | 0.060                        | 0.566      | 0.293      |
| <b><math>H_{\text{FE}}</math>: Unique rates for FEL stem and FEL crown</b><br>Figure S9C           | $\omega_{\text{background}} \neq \omega_1 \neq \omega_2$<br>$\omega_1 = \text{FEL stem branch}$<br>$\omega_2 = \text{FEL crown branches}$    | 743 genes<br>(75.13% of examined genes)              | 0.063                        | 0.711      | 0.061      |
| <b><math>H_{\text{SE}}</math>: Unique rates for SEL stem and SEL crown</b><br>Figure S9D           | $\omega_{\text{background}} \neq \omega_1 \neq \omega_2$<br>$\omega_1 = \text{SEL stem branch}$<br>$\omega_2 = \text{SEL crown branches}$    | 528 genes<br>(53.7% of examined genes)               | 0.059                        | 0.267      | 0.074      |
| <b><math>H_{\text{FE-SE crown}}</math>: Unique rates for FEL crown and SEL crown</b><br>Figure S9E | $\omega_{\text{background}} \neq \omega_1 \neq \omega_2$<br>$\omega_1 = \text{FEL crown branches}$<br>$\omega_2 = \text{SEL crown branches}$ | 717 genes<br>(72.5% of examined genes)               | 0.010                        | 0.062      | 0.074      |

1286

1287 **Main Figure Legends**

1288 **Fig 1. The evolutionary history and timeline of *Hanseniaspora* diversification and the**

1289 **stability of a long internode branch.**

(A) Using 1,034 single-copy orthologous

1290 genes (SCOG), the evolutionary history of *Hanseniaspora* in geologic time revealed two well-

1291 support lineages termed the fast evolving and slow evolving lineages (FEL and SEL,

1292 respectively), which began diversifying around 87.2 and 53.6 million years ago (mya) after

1293 diverging 95.3 mya. (B) Among single-gene phylogenies where the FEL and SEL were

1294 monophyletic ( $n = 946$ ), internode branch lengths leading up to each lineage revealed

1295 significantly longer internode branches leading up to the FEL ( $0.62 \pm 0.38$  base substitutions /

1296 site) compared to the SEL ( $0.17 \pm 0.11$  base substitutions / site) ( $p < 0.001$ ; Paired Wilcoxon

1297 Rank Sum test). (C) Examination of the difference between internode branch lengths per single-

1298 gene tree revealed 932 single-gene phylogenies had a longer branch length in the FEL compared

1299 to the SEL (depicted in orange with values greater than 0), while the converse was only observed

1300 in 14 single-gene phylogenies (depicted in blue with values less than 0). Across all single-gene

1301 phylogenies, the average difference between the internode branch length leading up to the two

1302 lineages was 0.45.

1303

1304 **Fig 2. Gene presence and absence analyses reflect phenotype and reveal disrupted**

1305 **pathways.**

(A) Examination of gene presence and absence (see *Methods*) revealed

1306 numerous genes that had been lost across *Hanseniaspora*. Specifically, 1,409 have been lost in

1307 the FEL, and 771 genes have been lost in the SEL. A Euler diagram represents the overlap of

1308 these gene sets. Both lineages have lost 748 genes, the FEL has lost an additional 661, and the

1309 SEL has lost an additional 23. (B) The *IMA* gene family (*IMAI-5*) encoding  $\alpha$ -glucosidases,

1310 *MAL* (*MALx1-3*) loci, and *SUC2* are associated with growth on maltose, sucrose, raffinose, and  
1311 melezitose. The *IMA* and *MAL* loci are largely missing among *Hanseniaspora* with the exception  
1312 of homologs *MALx1*, which encode diverse transporters of the major facilitator superfamily  
1313 whose functions are difficult to predict from sequence; as expected, *Hanseniaspora* spp. cannot  
1314 grow on maltose, raffinose, and melezitose with the sole exception of *Hanseniaspora jakobsenii*,  
1315 which has delayed/weak growth on maltose and is the only *Hanseniaspora* species with  
1316 (*MALx3*), which encodes a homolog of the *MAL*-activator protein. (C) The genes involved with  
1317 galactose degradation are largely missing among *Hanseniaspora* species, which correlates with  
1318 their inability to grow on galactose. Genes that are present are depicted in white, and genes that  
1319 are absent are depicted in black. The ability to grow, grow with delayed/weak growth on a given  
1320 substrate, or the inability to grow is specified using white, grey, and black circles, respectively;  
1321 dashes indicate no data. (D) Most genes involved in the thiamine biosynthesis pathway are  
1322 absent among all *Hanseniaspora*. (E) Many genes involved in the methionine salvage pathway  
1323 are absent among all *Hanseniaspora*. Absent genes are depicted in purple.

1324

1325 **Fig 3. Gene presence and absence in the budding yeast cell cycle.** Examination  
1326 of genes present and absent in the cell cycle of budding yeasts revealed numerous missing genes.  
1327 Many genes are key regulators, such as *WHI5*; participate in spindle checkpoint processes and  
1328 segregation, such as *MAD1* and *MAD2*; or DNA damage checkpoint processes, such as *MEC3*,  
1329 *RAD9*, and *RFX1*. Genes missing in both lineages, the FEL, or the SEL are colored purple,  
1330 orange, or blue, respectively. The “e” in the PHO cascade represents expression of Pho4:Pho2.  
1331 Dotted lines with arrows indicate indirect links or unknown reactions. Lines with arrows indicate  
1332 molecular interactions or relations. Circles indicate chemical compounds such as DNA.

1333

1334 **Fig 4. A panoply of genome maintenance and DNA repair genes are missing among**

1335 ***Hanseniaspora*, especially in the FEL.** Genes annotated as DNA repair genes

1336 according to gene ontology (GO:0006281) and child terms were examined for presence and

1337 absence in at least two-thirds of each lineage, respectively (268 total genes). 47 genes are

1338 missing among the FEL species, and 14 genes are missing among the SEL. Presence and absence

1339 of genes was clustered using hierarchical clustering (cladogram on the left) where each gene's

1340 ontology is provided as well. Genes with multiple gene annotations are denoted as such using the

1341 'multiple' term.

1342

1343 **Fig 5. dN/dS ( $\omega$ ) analyses supports a historical burst of accelerated evolution in the FEL.**

1344 (A) The null hypothesis ( $H_0$ ) that all branches in the phylogeny have the same  $\omega$  value.

1345 Alternative hypotheses (B-E) evaluate  $\omega$  along three sets of branches. (Bi) The alternative

1346 hypothesis ( $H_{FE-SE}$  branch) examined  $\omega$  values along the branch leading up the FEL and the SEL.

1347 (Bii) 311 supported  $H_0$  and 678 genes supported  $H_{FE-SE}$  branch. (Biii) Among the genes that

1348 supported  $H_{FE-SE}$  branch, we examined the distribution of the difference between  $\omega_1$  and  $\omega_2$  as

1349 specified in part Bi. Here, a range of  $\omega_1 - \omega_2$  of -3.5 to 3.5 is shown in the histogram.

1350 Additionally, we report the median  $\omega_1$  and  $\omega_2$  values, which are 0.57 and 0.29, respectively.

1351 (Biv) Among all genes examined, 0.39 genes significantly rejected  $H_0$  and were faster in the

1352 FEL than the SEL, and 0.30 genes were faster in the SEL than the FEL. (Ci) The alternative

1353 hypothesis ( $H_{FE}$ ) examined  $\omega$  values along the branch leading up to the FEL and all branches

1354 thereafter ( $FEL_{crown}$ ). (Cii) 246 genes supported  $H_0$ , and 743 genes supported  $H_{FE}$ . (Ciii) Among

1355 the genes that supported  $H_{FE}$ , we examined the distribution of the difference between  $\omega_1$  and  $\omega_2$

1356 as specified in part Ci. The median  $\omega_1$  and  $\omega_2$  values were 0.71 and 0.06, respectively. (Civ)  
1357 Among all genes, 0.73 genes significantly rejected  $H_0$  and were faster in the FEL than the  
1358 FEL<sub>crown</sub>, and 0.02 genes were faster in the FEL<sub>crown</sub> than the FEL. (Di) The alternative  
1359 hypothesis ( $H_{SE}$ ) examined  $\omega$  values along the branch leading up to the SEL and all branches  
1360 thereafter (SEL<sub>crown</sub>). (Dii) 455 genes supported  $H_0$ , and 528 genes supported  $H_{SE}$ . (Diii) Among  
1361 the genes that supported  $H_{SE}$ , we examined the distribution of the difference between  $\omega_1$  and  $\omega_2$   
1362 as specified in part Di. The median  $\omega_1$  and  $\omega_2$  values were 0.27 and 0.07, respectively. (Div)  
1363 Among all genes, 0.49 genes significantly rejected  $H_0$  and were faster in the SEL than the  
1364 SEL<sub>crown</sub>, and 0.05 genes were faster in the SEL<sub>crown</sub> than the SEL. (Ei) The alternative  
1365 hypothesis ( $H_{FE-SE\ crown}$ ) examined  $\omega$  values in the crown of the FEL<sub>crown</sub> and SEL<sub>crown</sub>. (Eii) 272  
1366 genes supported  $H_0$ , and 717 genes supported  $H_{FE-SE\ crown}$ . (Eiii) Among the genes that supported  
1367  $H_{FE-SE\ crown}$ , we examined the distribution of the difference between  $\omega_1$  and  $\omega_2$  as specified in part  
1368 Di. The median  $\omega_1$  and  $\omega_2$  values were 0.06 and 0.07, respectively. (Eiv) Among all genes, 0.22  
1369 genes significantly rejected  $H_0$  and were faster in the FEL<sub>crown</sub> compared to the SEL<sub>crown</sub>, and  
1370 0.51 genes were faster in the SEL<sub>crown</sub> than the FEL<sub>crown</sub>.

1371

1372 **Fig 6. Analyses of base substitutions and indels reveal a higher mutational load in the FEL**

1373 **compared to the SEL.** (A) Analyses of substitutions at evolutionarily tractable

1374 sites among codon-based alignments revealed a higher number of base substitutions in the FEL

1375 compared to the SEL ( $F(1) = 196.88, p < 0.001$ ; Multi-factor ANOVA) and an asymmetric

1376 distribution of base substitutions at codon sites ( $F(2) = 1691.60, p < 0.001$ ; Multi-factor

1377 ANOVA). A Tukey Honest Significance Differences post-hoc test revealed a higher proportion

1378 of substitutions in the FEL compared to the SEL at evolutionarily tractable sites at the first ( $n =$

1379 240,565;  $p < 0.001$ ), second ( $n = 318,987$ ;  $p < 0.001$ ), and third ( $n = 58,151$ ;  $p = 0.02$ ) codon  
1380 positions. (B) Analyses of the direction of base substitutions (i.e., G|C  $\rightarrow$  A|T or A|T  $\rightarrow$  G|C)  
1381 reveals significant differences between the FEL and SEL ( $F(1) = 447.1$ ,  $p < 0.001$ ; Multi-factor  
1382 ANOVA) and differences between the directionality of base substitutions ( $F(1) = 914.5$ ,  $p <$   
1383  $0.001$ ; Multi-factor ANOVA). A Tukey Honest Significance Differences post-hoc test revealed a  
1384 significantly higher proportion of substitutions were G|C  $\rightarrow$  A|T compared to A|T  $\rightarrow$  G|C among  
1385 evolutionarily tractable sites that are G|C ( $n = 232,546$ ) and A|T ( $n = 385,157$ ) ( $p < 0.001$ ),  
1386 suggesting a general AT-bias of base substitutions. Additionally, there was a significantly higher  
1387 proportion of evolutionary tractable sites with base substitutions in the FEL compared to the SEL  
1388 ( $p < 0.001$ ). More specifically, a higher number of base substitutions were observed in the FEL  
1389 compared to the SEL for both G|C  $\rightarrow$  A|T ( $p < 0.001$ ) and A|T  $\rightarrow$  G|C mutations ( $p < 0.001$ ), but  
1390 the bias toward AT was greater in the FEL. (C) Examinations of transition / transversion ratios  
1391 revealed a lower transition / transversion ratio in the FEL compared to the SEL ( $p < 0.001$ ;  
1392 Wilcoxon Rank Sum test). (D) Comparisons of insertions and deletions revealed a significantly  
1393 greater number of insertions ( $p < 0.001$ ; Wilcoxon Rank Sum test) and deletions ( $p < 0.001$ ;  
1394 Wilcoxon Rank Sum test) in the FEL ( $\bar{x}_{\text{insertions}} = 7521.11 \pm 405.34$ ;  $\bar{x}_{\text{deletions}} = 3894.11 \pm 208.16$ )  
1395 compared to the SEL ( $\bar{x}_{\text{insertions}} = 6049.571 \pm 155.85$ ;  $\bar{x}_{\text{deletions}} = 2346.71 \pm 326.22$ ). (E and F)  
1396 When adding the factor of size per insertion or deletion, significant differences were still  
1397 observed between the lineages ( $F(1) = 2102.87$ ,  $p < 0.001$ ; Multi-factor ANOVA). A Tukey  
1398 Honest Significance Differences post-hoc test revealed that most differences were caused by  
1399 significantly more small insertions and deletions in the FEL compared to the SEL. More  
1400 specifically, there were significantly more insertions in the FEL compared to the SEL for sizes 3-  
1401 18 ( $p < 0.001$  for all comparisons between each lineage for each insertion size), and there were



1402 significantly more deletions in the FEL compared to the SEL for sizes 3-21 ( $p < 0.001$  for all  
1403 comparisons between each lineage for each deletion size). Black lines at the top of each bar show  
1404 the 95% confidence interval for the number of insertions or deletions for a given size. (G)  
1405 Evolutionarily conserved homopolymers of sequence length two ( $n = 17,391$ ), three ( $n = 1,062$ ),  
1406 four ( $n = 104$ ), and five ( $n = 5$ ) were examined for substitutions and indels. Statistically  
1407 significant differences of the proportion mutated bases (i.e., (base substitutions + deleted bases +  
1408 inserted bases) / total homopolymer bases) were observed between the FEL and SEL ( $F(1) =$   
1409  $27.68, p < 0.001$ ; Multi-factor ANOVA). Although the FEL had more mutations than the SEL  
1410 for all homopolymers, a Tukey Honest Significance Differences post-hoc test revealed  
1411 differences were statistically significant for homopolymers of two ( $p = 0.02$ ) and three ( $p =$   
1412  $0.003$ ). Analyses of homopolymers using additional factors of mutation type (i.e., base  
1413 substitution, insertion, deletion) and homopolymer sequence type (i.e., A|T and C|G  
1414 homopolymers) can be seen in Fig S9. (H)  $G \rightarrow T$  or  $C \rightarrow A$  mutations are associated with the  
1415 common and abundant oxidatively damaged base, 8-oxo-dG. When examining all substituted G  
1416 positions for each species and their substitution direction, we found significant differences  
1417 between different substitution directions ( $F(2) = 5682, p < 0.001$ ; Multi-factor ANOVA). More  
1418 importantly, a Tukey Honest Significance Differences post-hoc test revealed an over-  
1419 representation of  $G \rightarrow T$  or  $C \rightarrow A$  in the FEL compared to the SEL ( $p < 0.001$ ). (I)  $CC \rightarrow TT$   
1420 dinucleotide substitutions are associated with UV damage. Using a  $CC|GG$  (left) and  $TT|AA$   
1421 (right) score, which is an indirect proxy for UV mutation damage where less UV damage would  
1422 result in a higher  $CC|GG$  score and more UV damage would result in a higher  $TT|AA$  score, we  
1423 found no significant differences when comparing  $CC|GG$  scores between the FEL, SEL, and  
1424 outgroup taxa ( $\chi^2(2) = 5.964, p = 0.05$ ; Kruskal-Wallis rank sum test); however, when

1425 comparing the outgroup taxa to all *Hanseniaspora*, a significant difference was observed ( $p =$   
1426 0.03; Wilcoxon Rank Sum test). When examining TT|AA scores, we found significant  
1427 differences between the FEL, SEL, and outgroup taxa ( $\chi^2(2) = 8.84, p = 0.01$ ; Kruskal-Wallis  
1428 rank sum test). A post-hoc Dunn's test using the Benjamini-Hochberg method for multi-test  
1429 correction revealed significant differences between the FEL and SEL compared to the outgroup  
1430 taxa ( $p = 0.01$  and  $0.02$ , respectively). A significant difference between all *Hanseniaspora* and  
1431 the outgroup taxa were also observed ( $p < 0.001$ ; Wilcoxon Rank Sum test). Results from the  
1432 Kruskal-Wallis rank sum test and the Wilcoxon Rank Sum test are differentiated using lines and  
1433 asterisks that are red and black, respectively.  
1434

1435 **Supplementary Figure Legends**

1436 **Fig S1. *Hanseniaspora* have among the smallest genome sizes, lowest number of genes, and**  
1437 **lowest percent GC content in the budding yeast subphylum Saccharomycotina.**

1438 (A) The genus *Hanseniaspora* (family Saccharomycodaceae) includes the smallest  
1439 budding yeast genome. The FEL, SEL, and all of Saccharomycotina have an average genome  
1440 size of  $9.71 \pm 1.32$  Mb (min: 8.10; max: 14.05),  $10.99 \pm 1.66$  Mb (min: 7.34; max: 12.17),  $12.80$   
1441  $\pm 3.20$  Mb (min: 7.34; max: 25.83), respectively. (B) The genus *Hanseniaspora* includes the  
1442 budding yeast genome with the fewest genes. The FEL, SEL, and all of Saccharomycotina have  
1443 an average number of genes per genome of  $4,707.89 \pm 633.56$  (min: 3,923; max: 6,380),  
1444  $4,932.43 \pm 289.71$  (min: 4,624; max: 5,349), and  $5,657.66 \pm 1,044.78$  (min: 3,923; max: 12,786),  
1445 respectively. (C) The genus *Hanseniaspora* has among the lowest GC-content values in budding  
1446 yeast genomes. The FEL, SEL, and all of Saccharomycotina GC-content values were  $33.10 \pm$   
1447  $3.53\%$  (min: 26.32; max: 37.17),  $37.28 \pm 2.05\%$  (min: 34.82; max: 39.93), and  $40.30 \pm 5.71\%$   
1448 (min: 25.2; max: 53.98), respectively. Families of Saccharomycotina are depicted on the y-axis.  
1449 Median values are depicted with a line, and dashed lines indicate plus or minus one standard  
1450 deviation from the median. To the right of each figure, boxplots depict the median and standard  
1451 deviations of each grouping. The grey represents all of Saccharomycotina. Blue represents the  
1452 SEL, and orange represents the FEL.

1453

1454 **Fig S2. Phylogenomics method pipeline.** Using 25 *Hanseniaspora* proteomes and the  
1455 proteomes of 4 outgroup taxa, 11,877 orthologous groups (OGs) of genes were identified. 1,143  
1456 OGs with few paralogs were identified as having few paralogs – that is,  $\geq 90\%$  of species do  
1457 not have paralogs and have one gene in the OG. The sequences of the 1,143 OGs were

1458 individually aligned, trimmed, had their evolutionary history inferred, and paralogs were  
1459 trimmed based on tree topology. Using the resulting 1,142 OGs with paralogs trimmed,  
1460 sequences were realigned and trimmed and had their evolutionary history inferred. If the  
1461 outgroup taxa were not the earliest diverging taxa after serially rooting on the outgroup taxa, the  
1462 OG was removed resulting in 1,034 OGs. Among these 1,034 OGs of genes, a concatenated  
1463 1,034-gene matrix was constructed and used for reconstructing evolutionary history. Similarly,  
1464 evolutionary history was inferred using coalescence of the 1,034 OG single-gene phylogenies.

1465  
1466 **Fig S3. Concatenation and coalescence produce nearly identical and well-supported**  
1467 **phylogenies that support two distinct lineages.** (Left) Concatenation supports one  
1468 lineage with a long internode branch leading to the clade, which we term the fast-evolving  
1469 lineage (FEL) and another lineage with a much shorter internode branch length leading to the  
1470 clade (SEL). (Right) Coalescence supports monophyly of the FEL and SEL. Minor discrepancies  
1471 are observed between the topologies. Bipartitions without full support have their support values  
1472 depicted. Support for concatenation and coalescence was determined using 100 rapid bootstrap  
1473 replicates and local posterior support, respectively.

1474  
1475 **Fig S4. Internode key to accompany divergence time estimate file per internode.**  
1476 Internode identifiers for timetree analysis in Fig 1B. Associated mean divergence time  
1477 and credible intervals can be found in File S2.

1478  
1479 **Fig S5. BUSCO analyses reveals extensive gene ‘missingness’ across various taxonomic**  
1480 **ranks.** BUSCO analyses of *Hanseniaspora* proteomes using the Eukaryota ( $n_{\text{BUSCOs}} =$

1481 303), Fungi (nBUSCOs = 290), Dikarya (nBUSCOs = 1,312), Ascomycota (nBUSCOs = 1,315),  
1482 Saccharomyceta (nBUSCOs = 1,759), and Saccharomycetales (nBUSCOs = 1,711) orthoDB databases  
1483 revealed numerous BUSCO genes are missing among *Hanseniaspora* genomes, in particular the  
1484 FEL.

1485

1486 **Fig S6. A liberal targeted gene searching pipeline and the number of missing genes in at**

1487 **least two-thirds of FEL and SEL taxa.** (A) A FASTA file for gene *X*, where gene *X*

1488 is the FASTA entry of a verified ORF in the *Saccharomyces cerevisiae* proteome, is used as a

1489 query to search for putative homologs in the Fungal reference sequence (refseq) database. The

1490 top 100 putative homologs were subsequently aligned. From the alignment, a Hidden Markov

1491 Model (HMM) was made. Using the HMM, gene *X* was searched for in the genome of each

1492 species from the FEL, SEL, and outgroup individually using a liberal e-value cut-off of 0.01 and

1493 a score of > 50. This pipeline yields presence and absence information of gene *X* among FEL,

1494 SEL, and outgroup taxa. This method was subsequently applied to all verified ORF in the *S.*

1495 *cerevisiae* proteome.

1496

1497 **Fig S7. Gene presence and absence reveals a putatively diminished gluconeogenesis**

1498 **pathway.** Gene presence and absence analysis of genes that participate in the

1499 gluconeogenesis (A) and glycolysis (B) pathway reveal key missing genes in the

1500 gluconeogenesis pathway, suggestive of a diminished capacity for gluconeogenesis. More

1501 specifically, *PCK1*, which encodes the enzyme that converts oxaloacetic acid to

1502 phosphoenolpyruvate, and *FBP1*, which encodes the enzyme that converts fructose-1,6-

1503 bisphosphate to fructose-6-phosphate, are missing among all *Hanseniaspora* species.

1504

1505 **Fig S8. Base frequency plots reveal diversity in ploidy of *Hanseniaspora* species.**

1506 (A) A lack of Gaussian distributions suggests *H. occidentalis* var. *occidentalis*, *H.*  
1507 *uvarum* CBS 314, and *H. guilliermondii* CBS 465 are haploid. (B) A single Gaussian distribution  
1508 suggests *H. occidentalis* var. *citrica*, *H. osmophila* CBS 313, *H. meyeri*, *H. clermontiae*, *H.*  
1509 *nectarophila*, *H. thailandica*, *H. pseudoguilliermondii*, *H. singularis*, and *K. hatyaiensis* are  
1510 diploids. (C) Two Gaussian distributions suggest *H. lachancei* and *H. jakobsenii* are triploid. (D)  
1511 Analyses of *H. vineae* CBS 2171, *H. valbyensis*, *Hanseniaspora* sp. CRUB 1602, and *H.*  
1512 *opuntiae* base frequency distributions were ambiguous. Certain FEL species, such as *H.*  
1513 *singularis*, *H. pseudoguilliermondii*, and *H. jakobsenii*, are potentially aneuploid, while evidence  
1514 of aneuploidy in the SEL is observed in only *H. occidentalis* var. *citrica*.

1515

1516 **Fig S9. Analyses of homopolymers by sequence length, type, and type of mutation.**

1517 Significant differences among the proportion of mutated bases among homopolymers of  
1518 various lengths were observed (Figure 5). Addition of variables (i.e., sequence type (A|T or C|G)  
1519 and mutation type (base substitution, insertion, and deletion)) allowed for further determination  
1520 of what types of mutations caused differences between the FEL and SEL. As shown in Figure 5,  
1521 we observed significant differences in the numbers of mutations between the FEL and SEL ( $F =$   
1522  $27.06, p < 0.001$ ; Multi-factor ANOVA) as well as in the type of mutations ( $F = 1686.70, p <$   
1523  $0.001$ ; Multi-factor ANOVA). A Tukey Honest Significance Differences post-hoc test revealed  
1524 that the proportion of nucleotides that underwent base substitutions was significantly greater than  
1525 insertions ( $p < 0.001$ ) and deletions ( $p < 0.001$ ). We next focused on significant differences  
1526 observed between the FEL and SEL when considering all factors. We observed significant

1527 differences between the FEL and SEL at A|T and C|G homopolymers with a length of 2 ( $p =$   
1528 0.009 and  $p < 0.001$ , respectively), C|G homopolymers of length 3 ( $p < 0.001$ ), and A|T  
1529 homopolymers of length 5 ( $p < 0.001$ ).

1530

1531 **Fig S10. Metrics reveal more radical amino acid substitutions in the FEL compared to**

1532 **SEL.** Using Sneath's index and Epstein's coefficient of difference, the average  
1533 difference among amino acid substitutions were determined among sites where the outgroup taxa  
1534 had all the same amino acid. Using either metric, amino acid substitutions were significantly  
1535 more drastic in the FEL compared to the SEL ( $p < 0.001$ ; Wilcoxon Rank Sum test for both  
1536 metrics).

1537

1538 **Fig S11. Mean protein similarity reveals immense diversity in *Hanseniaspora*.**

1539 The FEL spans a large amount of mean protein similarity when comparing various  
1540 species to *H. uvarum*. Similarly, but to a lesser degree, the same is true for the SEL when  
1541 comparing various species to *H. vineae*. The diversity observed in these lineages is roughly on  
1542 par with genus-level differences within the family Saccharomycetaceae, humans to zebrafish,  
1543 and thale cress (*Arabidopsis thaliana*) to Japanese rice.

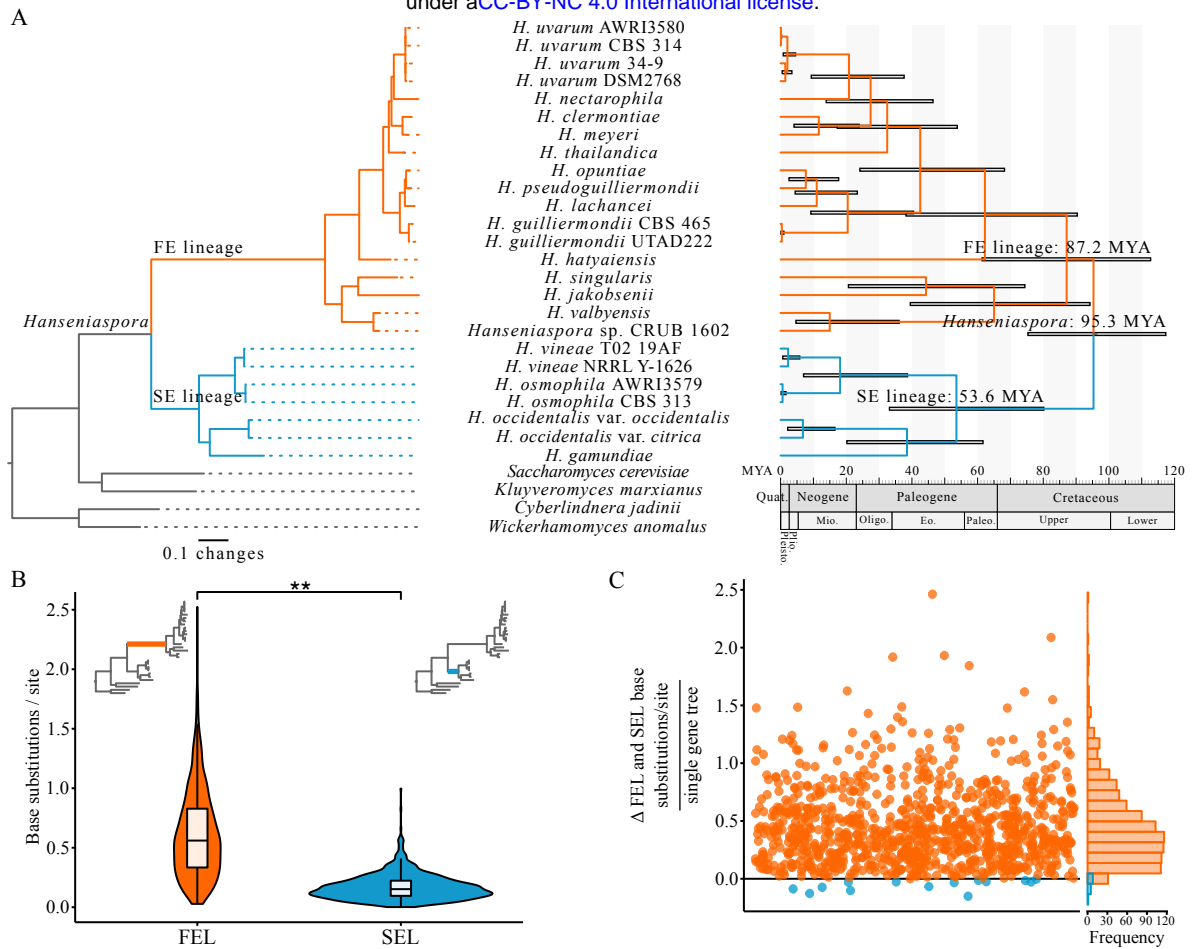



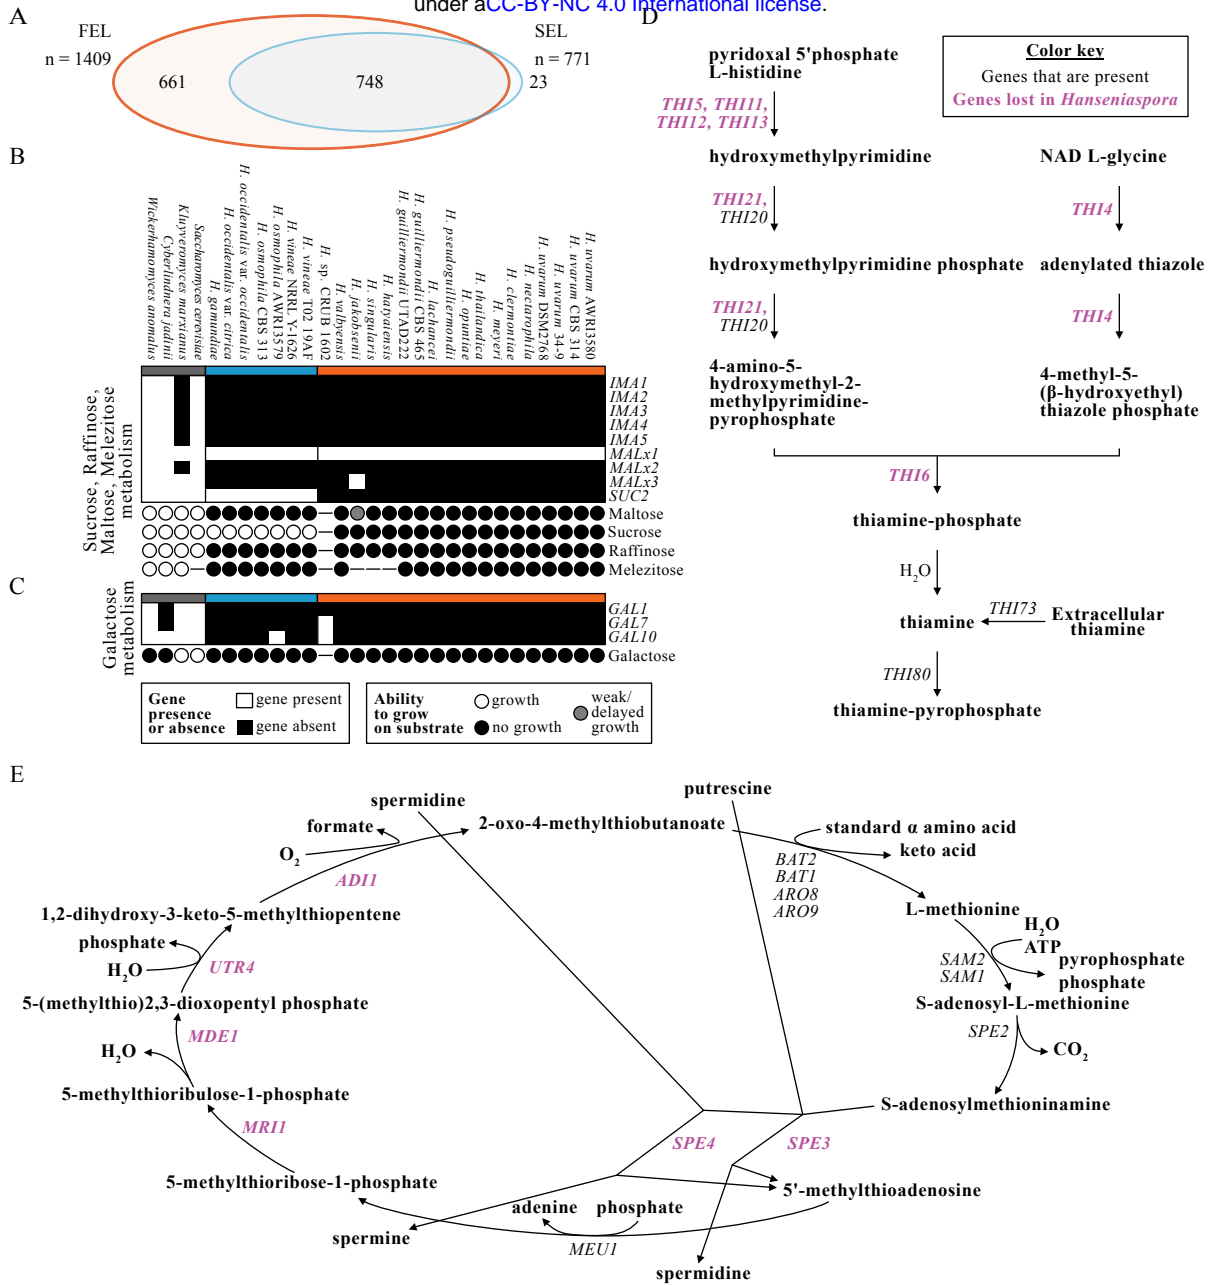

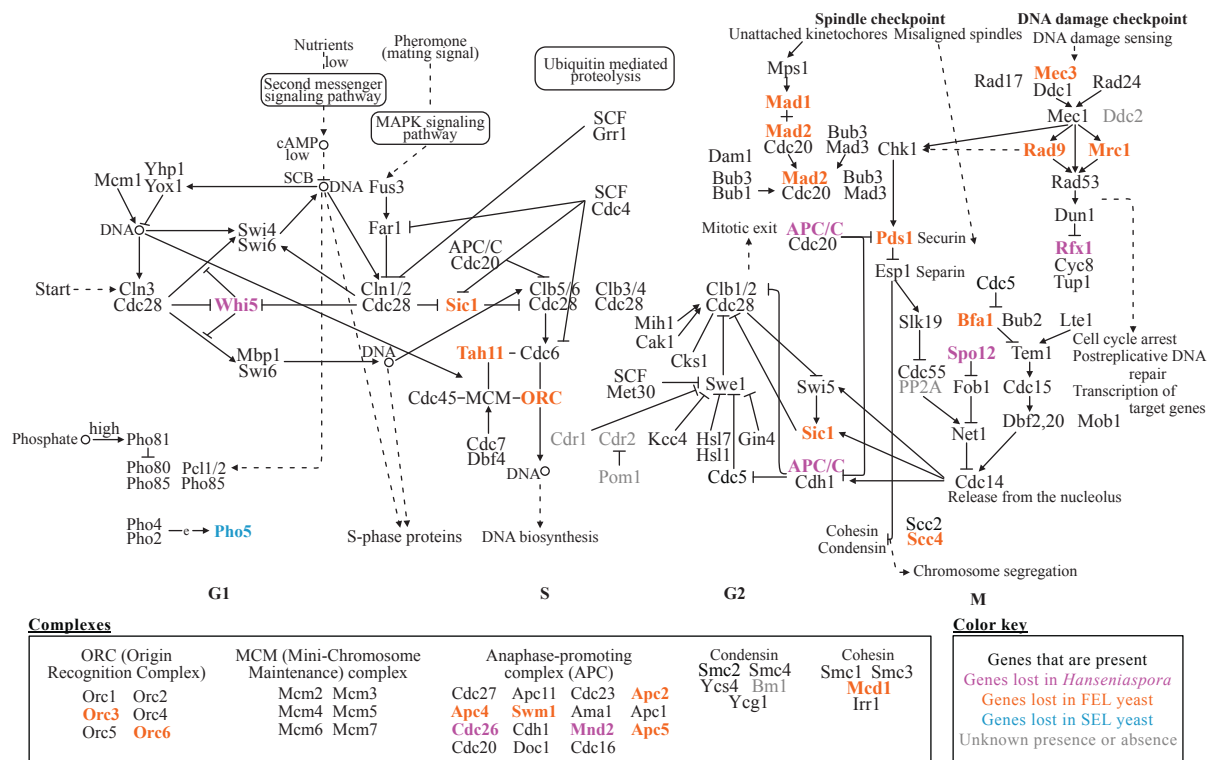

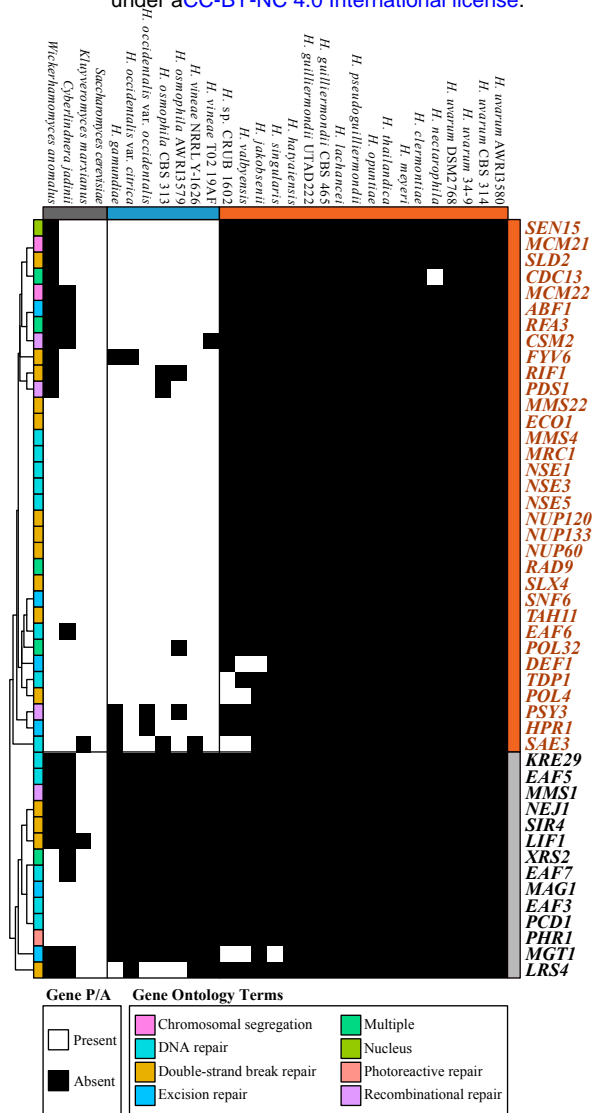

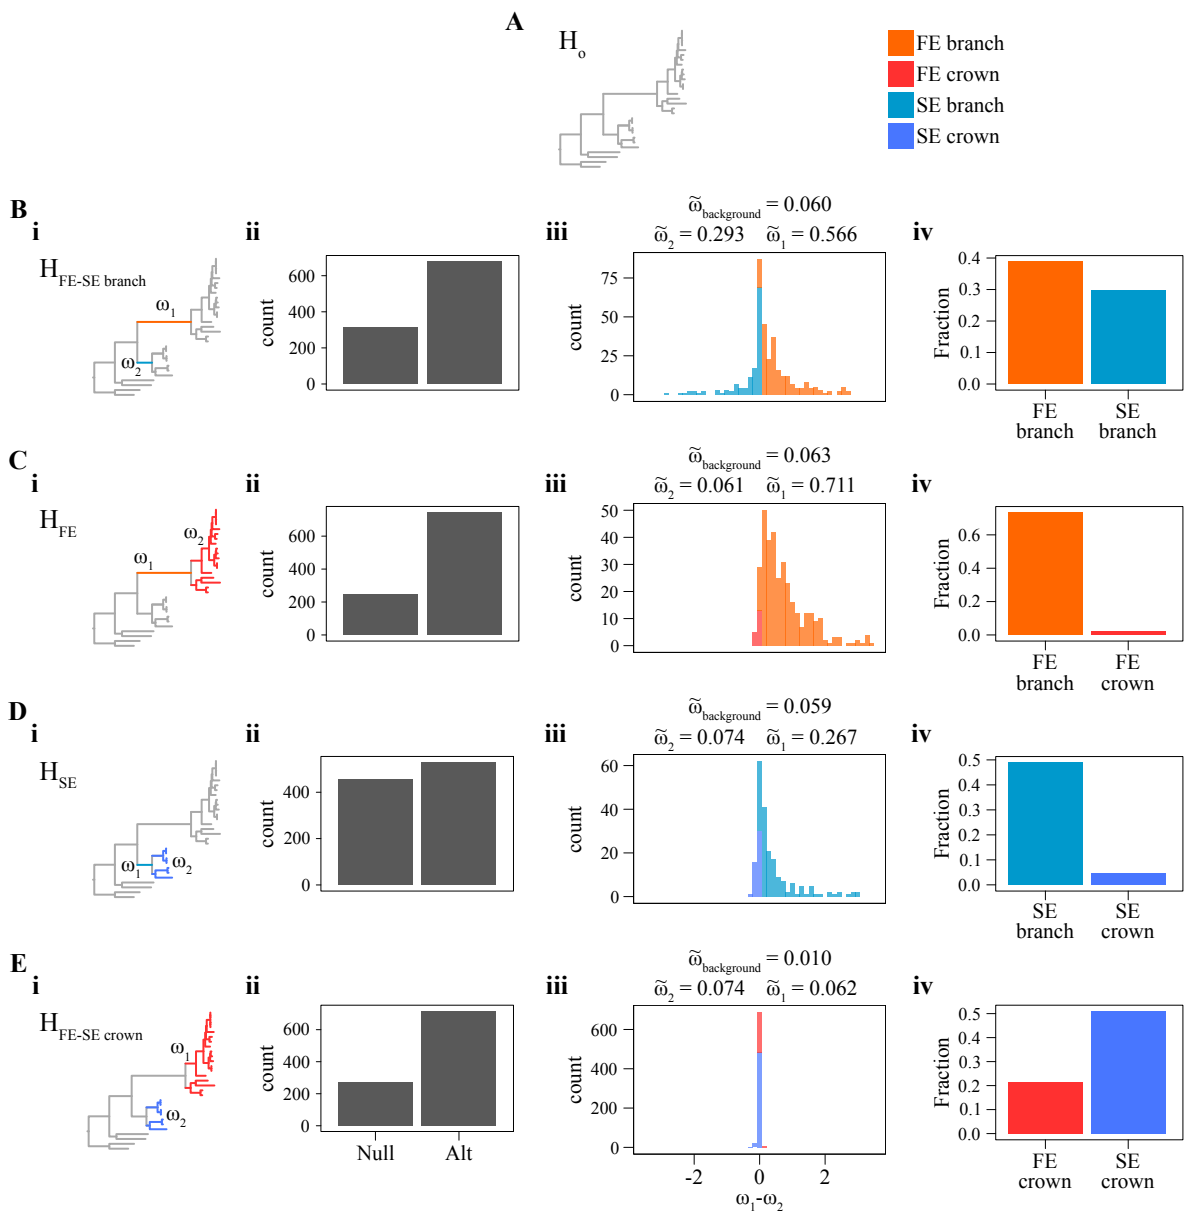

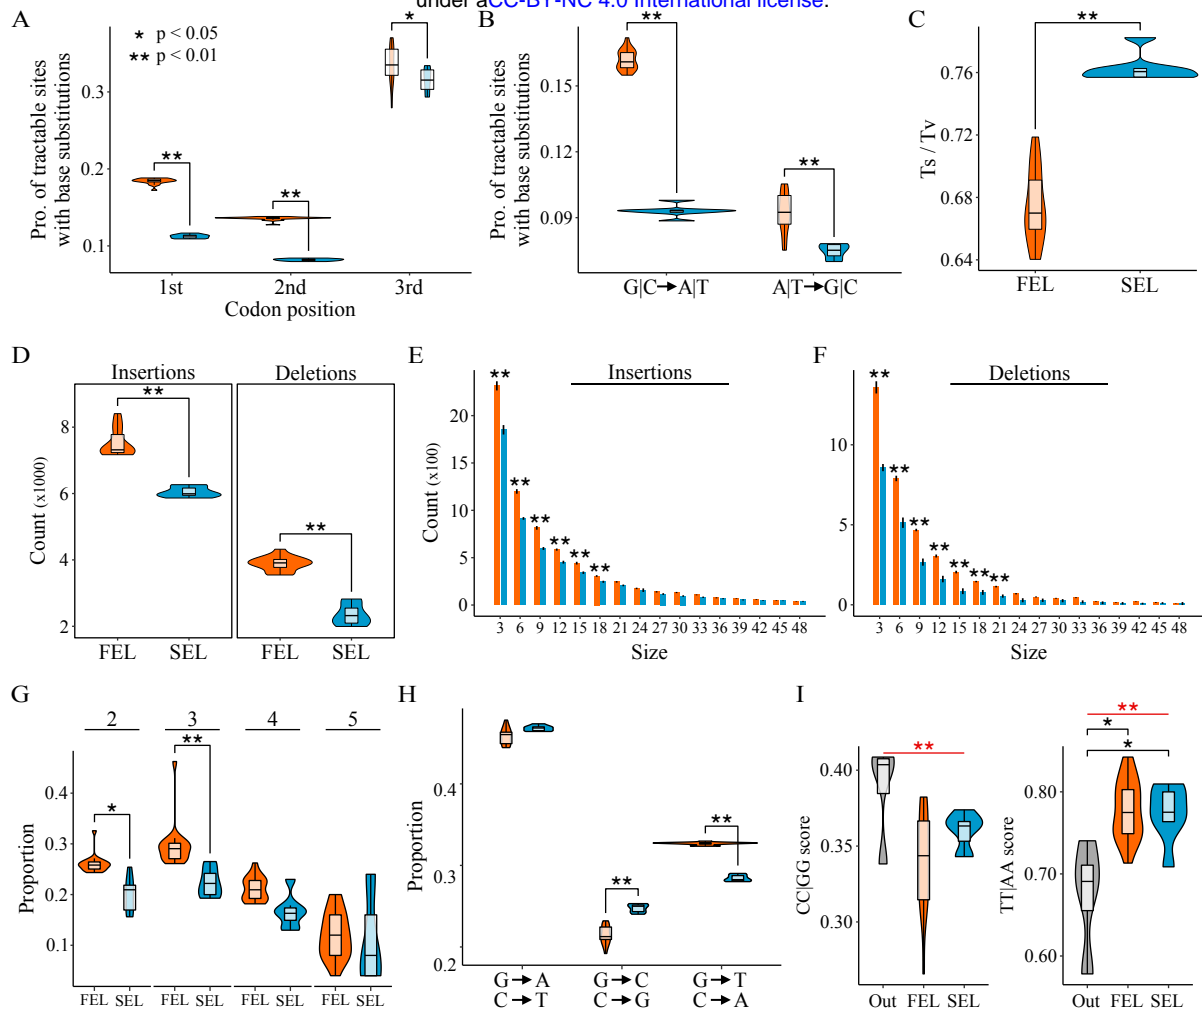

Source: https://www.biorxiv.org/content/10.1101/546366v1.full.pdf
